# Supplementary material
Source: ML conference proceedings conference paper supplement (https://openreview.net/forum?id=tiKJsepvr0)

A radar chart comparing three models across eight metrics. The metrics are labeled 1 through 8 around the perimeter. The radial scale ranges from 0 to 1.0, with concentric grid lines at 0.2 intervals. The orange series (top) shows high performance across most metrics, peaking at metric 1. The purple series (middle) shows moderate performance, with a peak at metric 2. The green series (bottom) shows lower performance overall, with a notable peak at metric 3.

| Metric | Orange Model | Purple Model | Green Model |
|--------|--------------|--------------|-------------|
| 1      | 0.85         | 0.65         | 0.55        |
| 2      | 0.75         | 0.85         | 0.55        |
| 3      | 0.55         | 0.55         | 0.85        |
| 4      | 0.55         | 0.55         | 0.55        |
| 5      | 0.85         | 0.55         | 0.55        |
| 6      | 0.55         | 0.55         | 0.55        |
| 7      | 0.55         | 0.55         | 0.55        |
| 8      | 0.55         | 0.55         | 0.55        |

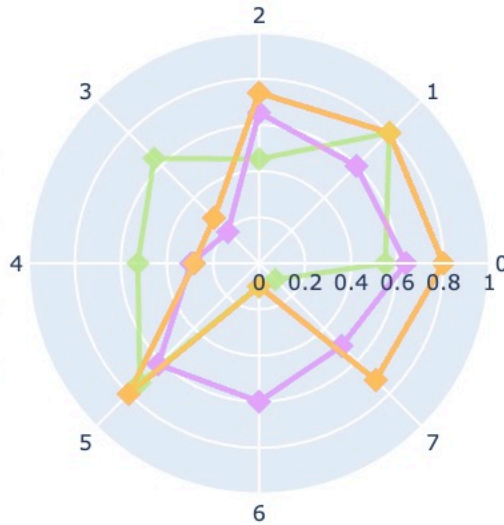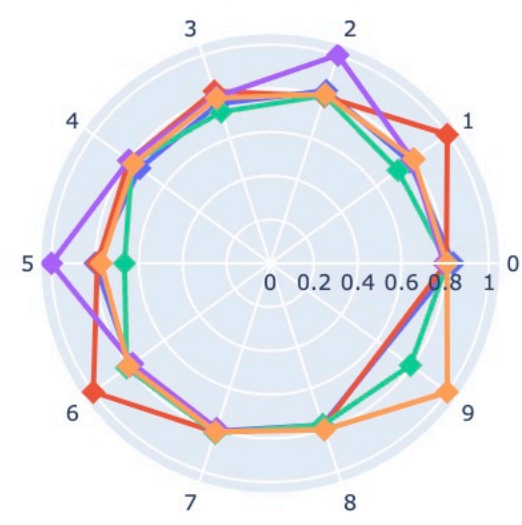

Supplement: supplementary_material [file attachment]
