# Supplementary material
Source: ML conference proceedings conference paper supplement (https://openreview.net/forum?id=tiKJsepvr0)
Supplement: supplementary_material [file attachment]

# OPTIMAL CLIENT TRAINING IN FEDERATED LEARNING WITH DEEP REINFORCEMENT LEARNING

**Anonymous authors**

Paper under double-blind review

## ABSTRACT

Federated Learning (FL) is a distributed framework for collaborative model training over large-scale distributed data. Centralized FL leverages a server to aggregate client models which can enable higher performance while maintaining client data privacy. However, it has been shown that in centralized model aggregation, performance can degrade in the presence of non-IID data across different clients. We remark that **training a client locally on more data than necessary does not benefit the overall performance of all clients**. In this paper, we devise a novel framework that leverages Deep Reinforcement Learning (DRL) to optimize an agent that selects the optimal amount of data necessary to train a client model without oversharing information with the server. Starting from complete unawareness of the client’s performance, the DRL agent utilizes the change in training loss as a reward signal and learns to optimize the amount of data necessary for improving the client’s performance. Specifically, after each aggregation round, the DRL algorithm considers the local performance as the current state and outputs the optimal weights for each class in the training data to be used during the next round of local training. In doing so, the agent learns a policy that creates the optimal partition of the local training dataset during the FL rounds. After FL, the client utilizes the entire local training dataset to further enhance its performance on its own data distribution, mitigating the non-IID effects of aggregation. Through extensive experiments, we demonstrate that training FL clients through our algorithm results in superior performance on multiple benchmark datasets and FL frameworks.

## 1 INTRODUCTION

Rise in computational power has enabled learning algorithms to learn from increasingly more data and it has generally been assumed that learning from more data leads to higher performance. However, the amount of data required by the learning algorithm still remains an arbitrary choice driven by personal whim and past experience. At the same time, in distributed systems, continuing to use more data for model training can pose privacy risk concerns, particularly in settings where data can be leaked or used for personal identification (Allouah et al., 2023; Wu et al., 2024; Fowl et al., 2023). Federated Learning has emerged as a powerful framework for distributed learning through which multiple parties, also known as clients, collaborate to train global models without sharing their data Li et al. (2021)McMahan et al. (2017). Centralized FL enables clients to perform limited training on local datasets while the centralized server aggregates the client parameters using different aggregation methods. In this way, each client’s data is kept private, and superior performance can be achieved.

Our primary motivation is that training a client locally on more data than necessary does not benefit the overall performance of all clients. This is because the data across different clients are not independent and two sets of data can cancel out their effects on the model update with the aggregation mechanism. Finding the optimal amount of data necessary for local training enables the client to optimize its own performance while maximizing contributions to the global model training through aggregation. Moreover, we empirically find that at the end of the federated learning rounds, the client benefits from unused data in the prior learning rounds by training the final aggregated parameters on the complete local training dataset. This unused data provides the client with fresh information enriching the model parameters. This phenomenon is illustrated through our experiments in Fig. 1.

054 In this paper, we build a novel Federated Learning  
 055 framework to find the optimal subset of local training  
 056 data. We first introduce the notion of an optimal  
 057 client, which finds the optimal ratio of local training  
 058 data to train the local model without oversharing local  
 059 information with the server. To maintain a distinction  
 060 between the optimal clients and all other clients in the  
 061 federated learning scheme, we refer to the remaining  
 062 clients, using all local training data, as naive clients.  
 063 Selection of the optimal subset is demonstrated in  
 064 Fig. 1(b) where the radii of the unit circle represent  
 065 the proportion of data used in naive clients and an  
 066 optimal client during FL. The annotations on the cir-  
 067 cumference represent each class in the client’s local  
 068 dataset (CIFAR-10). As shown in Fig. 1(a), using an  
 069 optimal subset of training data in the optimal client  
 070 does not hurt the performance of other naive clients.  
 071 At the same time, our new algorithm can improve the  
 072 performance of the optimal client compared with the  
 073 original strategy in FL. To build our optimal client,  
 074 we introduce Reinforcement Learning during the feder-  
 075 ated learning rounds to train an RL agent. The RL  
 076 agent takes the model performance on the client’s  
 077 local dataset in each federated learning round as the  
 078 current state. An action is defined as changing the  
 079 optimal ratio of training data to be used for local train-  
 080 ing. The optimal client treats the federated learning  
 081 setting as the environment and the reward for the RL  
 082 agent is the reduction in training loss. The action taken  
 083 by the agent selects a subset of local data for each  
 084 class in the dataset. The selected subset is then used  
 085 by the optimal client for local training to optimize a  
 086 given metric (i.e., F1 Scores, Recall, Precision, Accu-  
 087 racy, etc.) for each class in the dataset. As the feder-  
 088 ated learning rounds progress, the agent learns to opti-  
 089 mize the amount of local training data used by the  
 090 optimal client.

085 The contributions of this paper are summarized as follows:

- 087 • We provide a framework based on Deep Reinforcement Learning to select local training data used  
 088 for a client to be optimized. Additionally, we investigate and present the results of our proposed  
 089 framework using well-known Federated Learning aggregation algorithms.
- 091 • We design two unique functions for the reinforcement learning agent to take actions and adapt  
 092 them to the existing  $\epsilon$ -Greedy action selection set up.
- 093 • We design a reward function which takes into account the loss of the local client as well as the  
 094 amount of data utilized in local training.
- 096 • We conduct theoretical analysis and proof for an upper bound on the performance of the Optimal  
 097 Client during Federated Learning.

100 **2 PRELIMINARY**

102 **Federated Learning (FL)** is a distributed learning method that preserves data privacy by training  
 103 models locally on distributed devices. Instead of sharing actual data with a central server, only  
 104 local models or local model updates are shared. The server implements an aggregation algorithm  
 105 to combine the local models or model updates into a global model which is then disseminated back  
 106 to the local clients. A typical FL workflow is presented in Fig. 2. Formally, given a set of  $K$  total  
 107 clients, denote the overall datasets as  $D = \{D_1, D_2, \dots, D_K\}$  from all clients where each client only  
 leverage its local dataset with  $N$  samples  $D_k : \{x_n, y_n\}_{n=1}^N$ .

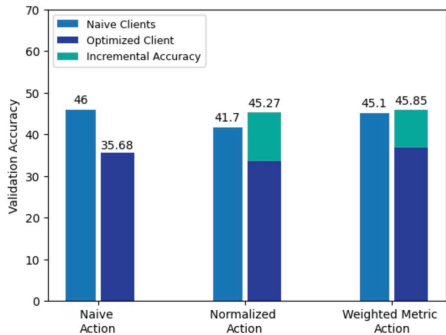

(a) Naive vs. Optimized Accuracy

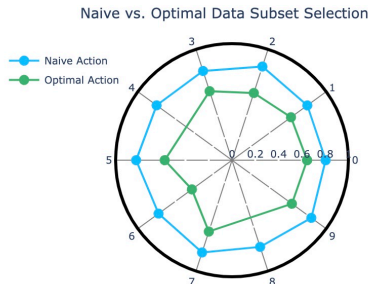

(b) Data selection in each of 10 classes

Figure 1: Naive vs. optimized clients.

In FedAvg McMahan et al. (2017), the federated learning objective can be written as:

$$\min_w f^*(w) \triangleq \frac{1}{K} \sum_{k=1}^K f_k(w) \quad (1)$$

Here  $w$  represents the global model parameters and  $f_k(w) : \mathbb{R} \mapsto \mathbb{R}$  is the expected local loss of the client defined as  $f_k(w) \triangleq \frac{1}{|D_k|} f_k(w, D_k)$  where  $f_k$  can be substituted for any loss function. The averaging algorithm can also be replaced by other algorithms such as FedMedian Yin et al. (2018) and FedCDA Wang et al. (2024a).

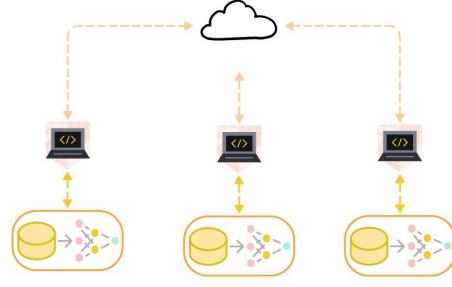

Figure 2: Federated learning workflow.

**Reinforcement Learning (RL)** enables building systems in which agents interact with environments to accomplish one or many tasks. Generally, RL systems are modeled as Markov Decision Processes (MDP). A time step  $t$ , the agent observes an initial state  $S_t \in S$  of the environment. Following a policy  $\pi_t(\cdot|s)$ , which maps states to actions, the agent takes an action  $A_t \in A$ . This transitions the environment to the next state  $S_{t+1}$  and the agent receives a reward signal  $R_{t+1} \in \mathbb{R}$ , informing the agent about the quality of its action. As shown in Fig. 3, the agent environment interaction model gives rise to *trajectories*  $(S_t, A_t, R_{t+1}, S_{t+1} \dots)$  (Sutton, 2018). The expected total reward is given as

$$G_t = \sum_{k=0}^{\infty} \gamma^k R_{t+k+1}, \text{ where } \gamma \in (0, 1) \text{ is the discount}$$

factor. The value of a given state is measured by the *State-Value Function*  $V_{\pi}(s) = \mathbb{E}_{\pi}[G_t | S_t = s]$ . Similarly, the quality of an action paired with a state is given by the *Action-Value Function*  $q_{\pi}(s, a) = \mathbb{E}_{\pi}[G_t | S_t = s, A_t = a]$ . The RL objective is to find an optimal policy  $\pi_*$  which maximizes an agent’s total return. Such a policy shares the optimal state-value function  $v_*(s) \doteq \max_{\pi} v_{\pi}(s)$  and the optimal action-value function  $q_*(s, a) \doteq \max_{\pi} q_{\pi}(s, a)$ . *Deep Reinforcement Learning (DRL)* combines the function approximation ability of Deep Learning with Reinforcement Learning’s sequential decision making. This enables building Reinforcement Learning systems which can generalize to large state and continuous action spaces. Using Deep Learning this process is accomplished by mapping large state spaces to features and features to actions. In recent years, Deep Learning has been extended to Reinforcement Learning methods (Gao et al., 2024; Liu et al., 2024; Schulman et al., 2017; Lillicrap et al., 2016).

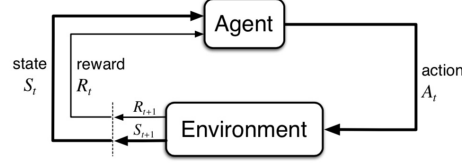

Figure 3: Agent environment interaction.

### 3 PROBLEM SETUP AND FRAMEWORK

Given the local dataset  $D_k$  on a client to be optimized, our target is to generate the optimal amount of training data  $D'_k$  for federated learning. Fig. 4 depicts the workflow to optimize the percentage of data in each class for the agent (i.e., the client highlighted with blue) to be optimized. We consider the aggregated parameters of the model on the server as the current state  $s_t$ . The action  $a_t$  is defined as a vector that represents the percentage of samples used for training in each class. Based on the performance of the aggregated parameters on the server, we calculate the reward  $r_t$  with a designed reward function. We train the policy  $\pi_{\theta}$  parameterized with  $\theta$  based on the reward  $r_t$ , generated from the loss of the aggregated model  $\mathcal{L}_{agg}$  and the loss of the client’s local model parameters  $\mathcal{L}_l$  based on local training. The training process encourages  $\pi_{\theta}$  to find the optimal percentage of data used in each class for creating  $D'_k$  in the upcoming FL rounds. Then, after the process of federated learning, we further leverage the complete dataset  $D_k$  to fine-tune the Optimal Client until its performance converges. Using  $D_k$  in the final training rounds gives the Optimal Client an incremental boost in performance resulting from unused data in the previous rounds. With the proposed framework, we can not only optimize local training but also guarantee that the data changes on the optimal client have little impact on the performance of other clients.

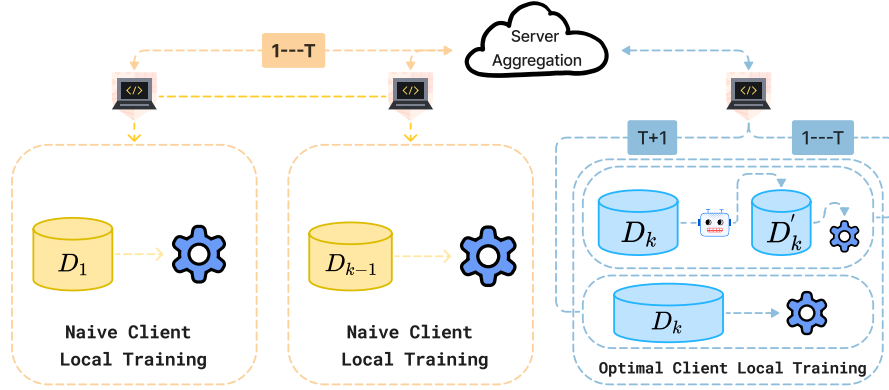

Figure 4: Optimal data selection framework.

## 4 METHOD

Given a total of  $T$  federated learning communication rounds, to train the RL agent, we utilize the class-wise performance measured on the local training dataset after server aggregation in the communication round  $t$  as the current state  $s_t$ . In our experiments, we use F1-Score given by  $F1 = \frac{2PR}{P+R}$  as a performance measure where  $P$  and  $R$  are Precision and Recall, respectively Goodfellow et al. (2016)Chinchor & Sundheim (1993). Note that F1-Score can be easily substituted for a different performance measure. The policy consumes this state  $s_t$  and outputs a vector action  $a_t$  containing weights  $z_c$  for each class  $c$  in the local dataset.

Formally, for  $K$  total clients in the federated learning scheme, with client  $k$  as the client to be optimized,  $D_k : \{X, Y\}$  as the local dataset for the Optimal Client, and  $w_t$  as the server aggregated parameters in the communication round  $t$ , the state for communication round  $t$  is:

$$s_t = F1(\hat{f}_k(X; w_t), Y) \quad (2)$$

Here,  $f_k(w_t)$  is the local model of the Optimal Client parameterized with the server aggregated parameters. Additionally, we implement two action selection strategies and adapt them to the  $\epsilon$ -Greedy method. Using a parameterized policy  $\pi_\theta$ , the action in round  $t$  is given by:

$$a_t = \pi_\theta(s_t) = [z_1, z_2, \dots, z_C] \Rightarrow \{z \in \mathbb{R}, b_l \leq z \leq b_u\} \text{ s.t. } b_l, b_u \in (0, 1], \quad (3)$$

where  $b_l$  and  $b_u$  are user-defined lower and upper bounds respectively.

**$\epsilon$ -Greedy Normalized Action** implements a normalized version of the action generated by the policy. The action vector  $a_t$  is first normalized and multiplied by the total samples in the local training dataset to get the count of data samples for each class  $c$  in the dataset.

$$a'_t \Leftarrow \frac{a_t}{\sum a_t} |D_k| \quad (4)$$

Here  $a' = [a'_1, a'_2, \dots, a'_C]$  is a vector of data sample counts for each class. The class counts are then adjusted to not exceed the total number of samples available for each class. Given that for each class in the local training dataset the maximum class count for each class is  $|D_{k_c}|$ , and  $Unif(0, 1)$  as the *Standard Uniform Distribution* on the interval  $(0, 1)$  (Blitzstein & Hwang, 2019), then the  $\epsilon$ -Greedy Normalized Action is given as:

$$a'_t \Leftarrow \begin{cases} \left[ \frac{\max(a'_1, |D_{k_1}|)}{|D_{k_1}|}, \frac{\max(a'_2, |D_{k_2}|)}{|D_{k_2}|}, \dots, \frac{\max(a'_C, |D_{k_C}|)}{|D_{k_C}|} \right] & \text{if } \frac{1}{\sqrt{t}} < Unif(0, 1), \\ \arg \max_a Q(a) & \text{otherwise.} \end{cases} \quad (5)$$

**$\epsilon$ -Greedy Weighted Metric Action** implements a look-back period  $\eta$ , where every  $\eta$  communication rounds, the Optimal Client computes the difference in the absolute value between the current F1-Score and the F1-Score from  $\eta$  rounds in the past. The difference is then normalized and for every

class where the F1-Score has decreased since  $\eta$  rounds, the weight for that class is increased by the normalized difference. Formally, given  $F1_{t+\eta}$  and  $F1_\eta$  as the F1-Scores in the current round and the F1-Scores from  $\eta$  rounds ago, then the normalized difference is given by:

$$\Delta F1 = \frac{|F1_{t+\eta} - F1_\eta|}{\sum_c |F1_{t+\eta} - F1_\eta|}. \quad (6)$$

With the F1 score, the agent’s action is given by:

$$a_t \leftarrow \begin{cases} a_t + \Delta F1 a_t & \text{if } \frac{1}{\sqrt{t}} < Unif(0, 1), \\ \arg \max_a Q(a) & \text{otherwise.} \end{cases} \quad (7)$$

The Optimal Client utilizes the action generated by the RL policy to create an *Action Partitioned Dataset*, denoted by  $D'_k$  such that  $D'_k \subset D_k$ . Fig. 5 illustrates this procedure.

As the federated learning rounds progress we implement a loss estimation mechanism. Specifically, the Optimal Client waits for  $\tau$  communication rounds and then in every subsequent round estimates the local loss for the local training update after the server aggregation in the following round. Based on the assumption that, as the federated learning rounds progress, the client’s local training on the local dataset is supposed to produce a lower training loss as we utilize the following piece-wise reward function.

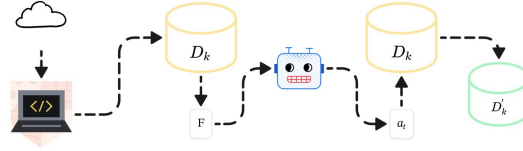

Figure 5: Action partitioned dataset.

$$R_t \leftarrow \begin{cases} \frac{\mathcal{L}_{agg} - \mathcal{L}_l}{\mathcal{L}_l} \frac{1}{a_t - \lambda} & \text{if } T < \tau, \\ \frac{\mathcal{L}_{agg} - \mathcal{L}_{est}}{\mathcal{L}_{est}} \frac{1}{a_t - \lambda} & \text{otherwise.} \end{cases} \quad (8)$$

Here,  $\mathcal{L}_{agg}$  is the loss on the local dataset after server aggregation,  $\mathcal{L}_l$  on the local dataset after local training,  $\mathcal{L}_{est} = -ue^{-vt}$  is the estimated loss,  $a_t = \frac{1}{|a_t|} \sum a_t$  is the mean action generated by the policy  $\pi_\theta$ , and  $\lambda$  is a user defined parameter which normalizes the reward by controlling the amount of local training data generated by the policy. As part of loss estimation,  $\mathcal{L}_{est}$ , we fit a non-linear curve (Vugrin et al., 2007) to estimate the parameters,  $u$  and  $v$ , after each federated learning round past  $\tau$  rounds. Using equation 2, equation 5, equation 7, and equation 8 we can generate RL trajectories  $(s_t, a_t, R_{t+1}, s_{t+1} \dots)$ . The actor-critic paradigm, in Deep Reinforcement Learning, then enables learning a parameterized actor policy  $\pi_\theta(a|s)$  which outputs an action  $a$  given the current state  $s$ , as well as a parameterized critic network  $v_\varphi(s)$  which approximates a state value function. The critic network can be updated through Mean Squared Error  $\nabla \mathcal{L}(\varphi|s_t, a_t) = (\hat{Q}_n(s_t, a_t) - v_\varphi(s_t))^2$  followed by the update for policy network  $\nabla_\theta \mathcal{L}(\theta|s_t, a_t) = \hat{Q}_n(s_t, a_t) \cdot \nabla_\theta \log \pi_\theta(a_t|s_t)$  where  $\hat{Q}_n(s_t, a_t) = \sum_{k=0}^{n-1} r_{t+k} + v_\varphi(s_{t+n})$  is the  $n$ -step target Plaatt (2022).

**Algorithm.** We present the algorithm to train the Optimal Client both from a server as well as a client perspective. The server-side implementation follows a typical federated learning setup up whereas the client-side implementation includes optimized training for the client both during and after Federated Learning. We use DDPG (Deep Deterministic Policy Gradient) (Lillicrap et al., 2016) to train the RL policy. For brevity, we don’t include the training of RL policy as part of this algorithm, but details regarding training the RL policy, including the algorithm and the hyperparameters for each experiment, can be found in Appendix A.4.

**Analysis.** In this section, we investigate if the performance of the Optimal Client has an upper bound during the federated learning rounds. Based on the assumption that using more data leads to higher performance, we note that the performance of the Optimal Client will not be as good as

---

**Algorithm 1** Optimal Client Training:  $K$  (number of total clients),  $C \in (0, 1) \mapsto \mathbb{R}$  (predetermined ratio of clients to participate in each round), *FederatedAggregation* (federated learning aggregation algorithm.),  $E$  (local train epochs)

---

**Server:**

```

274 initialize  $w_0$ 
275 for round  $t = 0, 1, 2, \dots, T$  do
276    $S_t = \{\text{random sample of } C * K \text{ Clients}\}$ 
277   for  $k \in S$  in parallel do
278      $w_{t+1} = \text{OptimalClientTrain}(k, w_t)$ 
279   end for
280    $w_{t+1} = \text{FederatedAggregation}(S_t)$ 
281 end for

```

**Client:**

```

282                                      $\triangleright \text{OptimalClientTrain}(k, w_t)$ 
283 while  $t \leq T$  do
284   Compute  $s_t$  using Equation. 2
285   Compute  $a_t$  using Equation. 3
286    $D'_k \leftarrow D_k(a_t)$                                       $\triangleright \text{ActionPartitionedDataset}$ 
287    $B \leftarrow \{\text{Create batches of size } B \in D'_k\}$ 
288   for  $e = 1, 2, 3 \dots$  in  $E$  do
289     for  $b$  in  $B$  do
290        $w_t \leftarrow w_t - \eta \nabla l(w; b)$ 
291     end for
292   end for
293 end while
294   return  $w_t$  to server
295    $B \leftarrow \{\text{Create batches of size } B \in D_k\}$ 
296   for  $e = 1, 2, 3 \dots$  in  $E$  do                                      $\triangleright \text{UntilConvergence}$ 
297     for  $b$  in  $B$  do
298        $w_t \leftarrow w_t - \eta \nabla l(w; b)$ 
299     end for
300 end for

```

---

if it was trained on its entire local dataset. Under this assumption we elucidate the answer to one main question: *Is there an upper bound to the performance of the Optimal Client during Federated Learning.*

**Proposition** (Performance Bound of Client Training) Given  $s_t$  and  $a_t = [z_1, z_2, \dots, z_C] \Rightarrow \{z \in \mathbb{R}, 0 \leq z \leq 1\}$  as the state and the action taken by the policy, let  $z$  be the radius of a unit circle representing the total available sample size for each class in the *Action Partitioned Dataset*  $D'_{k_{1,2,3 \dots C}} \forall c \in C$ . Let  $A = [Z_1, Z_2, \dots, Z_C] \Rightarrow \{Z \in \mathbb{R}, 0 \leq Z \leq 1\}$  be a vector representing the total samples for each class in the complete local client dataset  $D'_{k_{1,2,3 \dots C}} \forall c \in C$ . Additionally, let  $\omega = Z_C^2 - z_c^2$  be the difference in the squared radii. The performance bound, of the client trained on the complete dataset, for class  $c$  is defined as the area of the circle:

$$P_{k_c} = \pi Z_c^2 \quad (9)$$

Using Equation 9, the total performance of client  $k$ , on the complete local dataset, is given as:

$$P_k = \pi Z_1^2 + \pi Z_2^2 + \pi Z_3^2 + \dots + \pi Z_C^2$$

Similarly, using Equation 9, the performance of client  $k$  on the *Action Partitioned Dataset* is:

$$P'_k = \pi z_1^2 + \pi z_2^2 + \pi z_3^2 + \dots + \pi z_c^2$$

**Theorem:** A client trained on the *Action Partitioned Dataset*  $D'_k$  relative to the entire local dataset  $D_k$  has a performance bound given by:

$$P_k - P'_k \leq \Omega$$

324 *Proof:*

$$\begin{aligned}
 325 & \\
 326 & P_k - P'_k = \pi Z_1^2 + \pi Z_2^2 + \pi Z_3^2 + \dots + \pi Z_C^2 - \pi z_1^2 - \pi z_2^2 - \pi z_3^2 - \dots - \pi z_C^2 \\
 327 & = \pi Z_1^2 - \pi z_1^2 + \pi Z_2^2 - \pi z_2^2 + \pi Z_3^2 - \pi z_3^2 + \dots + \pi Z_C^2 - \pi z_C^2 \\
 328 & = \pi(Z_1^2 - z_1^2) + \pi(Z_2^2 - z_2^2) + \pi(Z_3^2 - z_3^2) \dots \pi(Z_C^2 - z_C^2) \\
 329 & = \pi\omega_1 + \pi\omega_2 + \pi\omega_3 \dots \pi\omega_C \\
 330 & \\
 331 & \\
 332 & \leq \pi \sum_{c=1}^C \omega_c = \Omega \\
 333 & \\
 334 &
 \end{aligned}$$

335 The proof above shows that constructing a dataset  $D'_k$  by minimizing the difference between the  
 336 action taken by the policy and the total sample size for each class in the dataset will lead to better  
 337 performance by the Optimal Client during the federated learning rounds. However, we note that this  
 338 also represents a trade-off between the performance improvement that the Optimal Client will benefit  
 339 from by retaining these data samples for training post the federated learning rounds.

## 340 5 EXPERIMENTAL SETUP

341 **Methods.** We conduct experiments of our proposed methodology using 5 Federated Learning  
 342 aggregation baseline algorithms. These algorithms include FedCDA Wang et al. (2024a), FedProx  
 343 Li et al. (2020), FedMedian Yin et al. (2018), FedAvgM Hsu et al. (2019), and FedAvg McMahan  
 344 et al. (2017). For Deep Reinforcement Learning we use DDPG Lillicrap et al. (2016) and we use  
 345 ResNet50 He et al. (2016) as the server and the client models.

346 **Datasets.** We conduct our experiments using 3 datasets including, CIFAR 10, CIFAR 100 Krizhevsky  
 347 et al. (2009), and FashionMNIST Xiao et al. (2017). Each dataset contains 10, 100, and 10 classes,  
 348 respectively. From the overall dataset, we create non-IID partitions using the Dirichlet Partitioner  
 349 Yurochkin et al. (2019), and each partition is given to each client as its own local dataset. Furthermore,  
 350 each partition is split using 80/20 training and validation split, where 80% of the data is used for  
 351 training and 20% of the data is used for validation.

352 **Results and Analysis** Our experiments show the utility of our proposed method compared to well-  
 353 established baselines. We conduct 100 Federated Learning rounds for 8 clients where each client is  
 354 trained for 1 local epoch. Through our experiments, we demonstrate the generalization capability of  
 355 our method in different federated learning settings. The results from our experiments are summarized  
 356 in Table 1, where we show a comparison of the best mean performance of the Naive Clients, including  
 357 Precision, Recall, and Accuracy, relative to the Optimal Client on the validation datasets. Each  
 358 two-row combination represents a comparison of the mean performance achieved by all naive clients  
 359 in the federated learning setup relative to the best performance of the Optimal Client achieved after  
 360 training on the complete local training dataset,  $D_k$ , post the federated learning rounds.

361 Fig. 6 shows the mean validation accuracy of the Naive Clients relative to the Optimal Client, after  
 362 each server aggregation during the federated learning rounds. The final validation accuracy of the  
 363 Optimal Client is plotted as a separate line which shows the best validation accuracy attained by the  
 364 Optimal Client by training on its entire local dataset after the federated learning rounds. It can be  
 365 observed that the Optimal Client produces lower performance relative to the naive client during the  
 366 federated learning rounds. This phenomenon is illustrated in Fig. 7 and attributed to the fact that  
 367 during the federated learning rounds the Optimal Client utilizes a smaller proportion of the local  
 368 dataset relative to all other clients. Fig. 7(a) shows normalized actions and Fig. 7(b) shows weighted  
 369 metric actions, taken by the RL policy in comparison to naive data selection using 80/20 train test split.  
 370 During the federated learning phase, the RL policy determines the minimum viable amount of data  
 371 necessary for local training. However, after the federated learning rounds finish, the Optimal Client is  
 372 trained on its entire local dataset until it converges. During this phase of local training, the Optimal  
 373 Client exhibits superior performance. In addition to the performance improvement of the Optimal  
 374 Client post federated learning rounds, we also observe a considerable increase in convergence speed  
 375 which can be ascribed to the fact that the Optimal Client resumes local training using the aggregated  
 376 parameters from the final federated learning round.

377 **Ablation Study.** As part of our ablation study, we conduct experiments using naive actions for every  
 client. Naive actions correspond to each client’s dataset being split using the 80/20 split. The results

378  
379  
380  
381  
382  
383  
384  
385  
386  
387  
388  
389  
390  
391  
392  
393  
394  
395  
396  
397  
398  
399  
400  
401  
402  
403  
404  
405  
406  
407  
408  
409  
410  
411  
412  
413  
414  
415  
416  
417  
418  
419  
420  
421  
422  
423  
424  
425  
426  
427  
428  
429  
430  
431

|                        | Cifar 10     |              |              | FashionMNIST |              |              | CIFAR 100    |              |              |
|------------------------|--------------|--------------|--------------|--------------|--------------|--------------|--------------|--------------|--------------|
|                        | Precision    | Recall       | Accuracy     | Precision    | Recall       | Accuracy     | Precision    | Recall       | Accuracy     |
| FedAvg                 | 50.28        | 38.15        | 29.65        | <b>73.41</b> | 52.58        | 37.47        | 16.88        | 16.15        | 13.01        |
| FedAvg + Our Method    | <b>52.41</b> | <b>48.28</b> | <b>43.22</b> | 67.23        | <b>58.19</b> | <b>53.31</b> | <b>20.17</b> | <b>17.99</b> | <b>24.90</b> |
| FedAvgM                | 50.27        | 38.00        | 31.10        | <b>76.04</b> | 55.24        | 38.14        | 16.90        | 16.13        | 13.26        |
| FedAvgM + Our Method   | <b>53.96</b> | <b>48.85</b> | <b>43.36</b> | 67.24        | <b>58.69</b> | <b>51.25</b> | <b>20.87</b> | <b>18.61</b> | <b>26.10</b> |
| FedMedian              | 44.20        | 35.48        | 31.81        | <b>75.42</b> | 56.45        | 42.67        | 15.84        | 15.40        | 13.21        |
| FedMedian + Our Method | <b>53.72</b> | <b>47.28</b> | <b>42.58</b> | 64.45        | <b>59.29</b> | <b>49.74</b> | <b>20.82</b> | <b>19.02</b> | <b>25.75</b> |
| FedProx                | 50.84        | 39.10        | 31.20        | <b>75.92</b> | 54.93        | 37.64        | 16.73        | 16.00        | 13.27        |
| FedProx + Our Method   | <b>53.51</b> | <b>48.50</b> | <b>42.94</b> | 65.90        | <b>57.66</b> | <b>50.18</b> | <b>21.34</b> | <b>18.42</b> | <b>26.14</b> |
| FedCDA                 | 46.52        | 34.42        | 30.69        | <b>76.38</b> | 55.54        | 38.56        | 13.44        | 12.95        | 12.10        |
| FedCDA + Our Method    | <b>57.03</b> | <b>50.61</b> | <b>43.64</b> | 66.19        | <b>56.99</b> | <b>49.87</b> | <b>21.54</b> | <b>19.50</b> | <b>26.47</b> |

Table 1: Performance comparison with baseline methods. Each two-row combination shows the mean performance of naive clients, over the complete federated learning rounds, relative to the performance of the Optimal Client, after the federated learning rounds, from training on the complete local dataset.

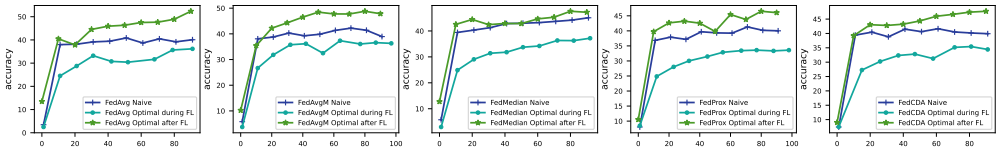

Figure 6: Mean accuracy in FL rounds. The blue line represents the mean accuracy of all naive clients. The green line represents the accuracy of the Optimal Client. The dark green line represents the accuracy of the Optimal Client in each epoch after federated learning rounds.

of our ablation experiments are summarized in Table 2. It is evident from the results that learning a RL policy to partition the local dataset, during the federated learning rounds, followed by training on the complete local dataset, yields improved overall performance for the Optimal Client.

**Discussion.** Our experimental findings show that training a client on a subset of its own local data allows the client to improve its performance during the federated learning rounds, and benefit considerably by training on the complete dataset after the federated learning rounds. Utilizing RL, a parameterized policy can be learned and optimized, on the client’s local performance, as the client interacts with the server. This enables the client to dynamically create subsets of its local training data. During federated learning, the client benefits from aggregation while post federated learning the client leverages information from unused samples to further improve its performance. We note that training on a smaller subset of data can make the Optimal Client marginally lag in performance relative to other clients. This sets up our motivation to further investigate potential solutions for maintaining competitive performance during the federated learning rounds.

|                                 | Precision | Recall | Accuracy |
|---------------------------------|-----------|--------|----------|
| FedAvg (original)               | 78.96     | 59.10  | 41.21    |
| FedAvg (with optimal client)    | 73.41     | 52.58  | 37.47    |
| FedAvgM (original)              | 77.45     | 56.49  | 38.86    |
| FedAvgM (with optimal client)   | 76.04     | 55.24  | 38.14    |
| FedMedian (original)            | 76.68     | 56.92  | 41.28    |
| FedMedian (with optimal client) | 75.42     | 56.54  | 42.67    |
| FedProx (original)              | 78.70     | 58.68  | 40.62    |
| FedProx (with optimal client)   | 75.92     | 54.93  | 37.64    |
| FedCDA (original)               | 73.92     | 52.74  | 37.19    |
| FedCDA (with optimal client)    | 76.38     | 55.54  | 38.56    |

Table 2: Effects of the optimal client on other naive clients. All experiment was conducted on the local dataset using 80/20 training and validation split.

6 RELATED WORKS.

Since our work prioritizes improving client performance in a federated learning setting, we provide an overview of related methods and techniques that address data heterogeneity issues and improve client personalization. These areas form the cross-section of technologies that enable our research.



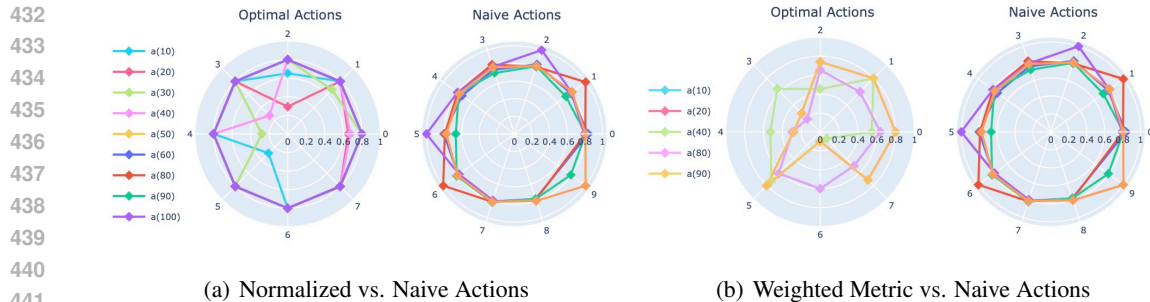

Figure 7: Optimal actions taken by the RL agent in different federated learning rounds, versus Naive Actions taken by each client. The legend displays actions taken by the RL agent.

**Data Heterogeneity Issues.** Data Heterogeneity can potentially have an adverse impact on model convergence as well as final model performance (Kim et al., 2023; Yu et al., 2023; Heinbaugh et al., 2023; Li et al., 2020; Karimireddy et al., 2020). To address this issue, many variants of FL aggregation algorithms, since FedAVG McMahan et al. (2017) have been proposed. FedProx Li et al. (2020) add a proximal term to get the local models to be closer to the global model. FedDC Gao et al. (2022) addresses data heterogeneity through a local drift variable which improves model consistency and performance, resulting in faster convergence across diverse tasks. FedCDA Wang et al. (2024a) addresses this issue in a cross-round setting by selecting and aggregating local models that minimize divergence from the global model. Tang et al. (2024) improve client updates in an attempt to improve the global model performance. Huang et al. (2024) introduce two compressed FL algorithms that attain improved performance under arbitrary data heterogeneity. (Wang et al., 2024b; Li et al., 2024) study data heterogeneity in an asynchronous setting and propose methods for caching local client updates to measure each client’s contribution to the global model as well as reducing staleness of clients in global model updates.

**Personalization and Optimization.** Due to device as well as data heterogeneity, training client models on local data can potentially result in better outcomes relative to participating in federated learning (Wu et al., 2020). Personalization (Xu et al., 2023; Tan et al., 2022) attempts to circumvent this shortcoming by improving client performance while taking local data distribution of a client into consideration (Jiang et al., 2024). Huang et al. (2021) propose a method, FedAMP, by which they enable a message passing mechanism between similar clients in a federated setting to improve performance amongst them. FedALA Zhang et al. (2023) achieves better personalization by adapting to the local objective through element-wise aggregation of the global and the local model. FedPAC Scott et al. (2024) implements a regularization term to account for the label distribution shift scenario amongst clients, and learns shared feature extraction layers in deep neural networks across clients as well as shared classification heads in clients with similar data distributions. (Wang et al., 2024c; Kim et al., 2024; Cheng et al., 2024) study hyperparameter optimization and momentum to gain faster convergence whereas (Fan et al., 2024) study client fairness based on contribution. Chanda et al. (2024) strive for improved performance by training clients on coresets of their local training data, by assigning a weight vector to each client, which acts as the coreset weight.

## 7 CONCLUSION

In our work, we propose a novel method to train clients for improved personalization through efficient usage of the client’s own local data. In doing so, we leverage deep reinforcement learning’s planning and sequential decision making capabilities. Our method shows that efficient utilization of local data can enable clients to have better performance compared to naive training on the local dataset during federated learning. Additionally, we show that a learned RL policy, by designing an adequate reward function, can aid the client in optimizing its performance. We note that utilizing a smaller subset of local data can result in lower performance during the federated learning rounds and to remedy this we establish a theoretical upper bound on client performance, and present a trade-off between improving performance during federated learning rounds versus improving performance post federated learning. Overall, we hope that our work encourages more research interest in utilizing RL to orchestrate client training in a federated setting and future works extend the ideas presented in our work to multiple clients using multi-agent as well as model-based RL systems.

## REFERENCES

- 486  
487  
488 Youssef Allouah, Rachid Guerraoui, Nirupam Gupta, Rafael Pinot, and John Stephan. On the  
489 privacy-robustness-utility trilemma in distributed learning. In Andreas Krause, Emma Brunskill,  
490 Kyunghyun Cho, Barbara Engelhardt, Sivan Sabato, and Jonathan Scarlett (eds.), *International*  
491 *Conference on Machine Learning, ICML 2023, 23-29 July 2023, Honolulu, Hawaii, USA*, volume  
492 202 of *Proceedings of Machine Learning Research*, pp. 569–626. PMLR, 2023. URL <https://proceedings.mlr.press/v202/allouah23a.html>.  
493
- 494 Daniel J Beutel, Taner Topal, Akhil Mathur, Xinchu Qiu, Javier Fernandez-Marques, Yan Gao,  
495 Lorenzo Sani, Hei Li Kwing, Titouan Parcollet, Pedro PB de Gusmão, and Nicholas D Lane.  
496 Flower: A friendly federated learning research framework. *arXiv preprint arXiv:2007.14390*,  
497 2020.
- 498 Joseph K Blitzstein and Jessica Hwang. *Introduction to probability*. Chapman and Hall/CRC, 2019.  
499
- 500 Lars Buitinck, Gilles Louppe, Mathieu Blondel, Fabian Pedregosa, Andreas Mueller, Olivier Grisel,  
501 Vlad Niculae, Peter Prettenhofer, Alexandre Gramfort, Jaques Grobler, Robert Layton, Jake  
502 VanderPlas, Arnaud Joly, Brian Holt, and Gaël Varoquaux. API design for machine learning  
503 software: experiences from the scikit-learn project. In *ECML PKDD Workshop: Languages for*  
504 *Data Mining and Machine Learning*, pp. 108–122, 2013.
- 505 Prateek Chanda, Shrey Modi, and Ganesh Ramakrishnan. Bayesian coreset optimization for person-  
506 alized federated learning. In *The Twelfth International Conference on Learning Representations*,  
507 2024. URL <https://openreview.net/forum?id=uz7d2N2zul>.
- 508 Ziheng Cheng, Xinmeng Huang, Pengfei Wu, and Kun Yuan. Momentum benefits non-iid federated  
509 learning simply and provably. In *The Twelfth International Conference on Learning Representa-*  
510 *tions*, 2024. URL <https://openreview.net/forum?id=TdhkAcXkRi>.
- 511  
512 Nancy Chinchor and Beth M Sundheim. Muc-5 evaluation metrics. In *Fifth Message Understanding*  
513 *Conference (MUC-5): Proceedings of a Conference Held in Baltimore, Maryland, August 25-27,*  
514 *1993*, 1993.
- 515 Zhenan Fan, Huang Fang, Xinglu Wang, Zirui Zhou, Jian Pei, Michael Friedlander, and Yong Zhang.  
516 Fair and efficient contribution valuation for vertical federated learning. In *The Twelfth International*  
517 *Conference on Learning Representations*, 2024. URL [https://openreview.net/forum?](https://openreview.net/forum?id=sLQb8q0sUi)  
518 [id=sLQb8q0sUi](https://openreview.net/forum?id=sLQb8q0sUi).
- 519  
520 Liam H. Fowl, Jonas Geiping, Steven Reich, Yuxin Wen, Wojciech Czaja, Micah Goldblum, and  
521 Tom Goldstein. Decepticons: Corrupted transformers breach privacy in federated learning for  
522 language models. In *The Eleventh International Conference on Learning Representations, ICLR*  
523 *2023, Kigali, Rwanda, May 1-5, 2023*. OpenReview.net, 2023. URL [https://openreview.](https://openreview.net/forum?id=r0BrY4BiEXO)  
524 [net/forum?id=r0BrY4BiEXO](https://openreview.net/forum?id=r0BrY4BiEXO).
- 525 Liang Gao, Huazhu Fu, Li Li, Yingwen Chen, Ming Xu, and Cheng-Zhong Xu. Feddc: Federated  
526 learning with non-iid data via local drift decoupling and correction. In *Proceedings of the*  
527 *IEEE/CVF conference on computer vision and pattern recognition*, pp. 10112–10121, 2022.
- 528 Ziqi Gao, Tao Feng, Jiaxuan You, Chenyi Zi, Yan Zhou, Chen Zhang, and Jia Li. Deep reinforcement  
529 learning for modelling protein complexes. In *The Twelfth International Conference on Learning*  
530 *Representations*, 2024. URL <https://openreview.net/forum?id=4MsfQ2H01P>.
- 531  
532 Ian Goodfellow, Yoshua Bengio, Aaron Courville, and Yoshua Bengio. *Deep learning*, volume 1.  
533 MIT Press, 2016.
- 534 Charles R. Harris, K. Jarrod Millman, Stéfan J. van der Walt, Ralf Gommers, Pauli Virtanen, David  
535 Cournapeau, Eric Wieser, Julian Taylor, Sebastian Berg, Nathaniel J. Smith, Robert Kern, Matti  
536 Picus, Stephan Hoyer, Marten H. van Kerkwijk, Matthew Brett, Allan Haldane, Jaime Fernández  
537 del Río, Mark Wiebe, Pearu Peterson, Pierre Gérard-Marchant, Kevin Sheppard, Tyler Reddy,  
538 Warren Weckesser, Hameer Abbasi, Christoph Gohlke, and Travis E. Oliphant. Array programming  
539 with NumPy. *Nature*, 585(7825):357–362, September 2020. doi: 10.1038/s41586-020-2649-2.  
URL <https://doi.org/10.1038/s41586-020-2649-2>.

- 540 Kaiming He, Xiangyu Zhang, Shaoqing Ren, and Jian Sun. Deep residual learning for image  
541 recognition. In *Proceedings of the IEEE conference on computer vision and pattern recognition*,  
542 pp. 770–778, 2016.
- 543 Clare Elizabeth Heinbaugh, Emilio Luz-Ricca, and Huajie Shao. Data-free one-shot federated learning  
544 under very high statistical heterogeneity. In *The Eleventh International Conference on Learning*  
545 *Representations*, 2023. URL [https://openreview.net/forum?id=\\_hb4vM3jSpB](https://openreview.net/forum?id=_hb4vM3jSpB).
- 546 Tzu-Ming Harry Hsu, Hang Qi, and Matthew Brown. Measuring the effects of non-identical data  
547 distribution for federated visual classification. *arXiv preprint arXiv:1909.06335*, 2019.
- 548 Xinmeng Huang, Ping Li, and Xiaoyun Li. Stochastic controlled averaging for federated learn-  
549 ing with communication compression. In *The Twelfth International Conference on Learning*  
550 *Representations*, 2024. URL <https://openreview.net/forum?id=jj5ZjZsWJe>.
- 551 Yutao Huang, Lingyang Chu, Zirui Zhou, Lanjun Wang, Jiangchuan Liu, Jian Pei, and Yong Zhang.  
552 Personalized cross-silo federated learning on non-iid data. In *Proceedings of the AAAI conference*  
553 *on artificial intelligence*, volume 35, pp. 7865–7873, 2021.
- 554 J. D. Hunter. Matplotlib: A 2d graphics environment. *Computing in Science & Engineering*, 9(3):  
555 90–95, 2007. doi: 10.1109/MCSE.2007.55.
- 556 Plotly Technologies Inc. Collaborative data science, 2015. URL <https://plot.ly>.
- 557 Nathalie Japkowicz and Mohak Shah. *Evaluating learning algorithms: a classification perspective*.  
558 Cambridge University Press, 2011.
- 559 Meirui Jiang, Anjie Le, Xiaoxiao Li, and Qi Dou. Heterogeneous personalized federated learn-  
560 ing by local-global updates mixing via convergence rate. In *The Twelfth International Confer-*  
561 *ence on Learning Representations*, 2024. URL [https://openreview.net/forum?id=](https://openreview.net/forum?id=7pWRLDBAtc)  
562 [7pWRLDBAtc](https://openreview.net/forum?id=7pWRLDBAtc).
- 563 Sai Praneeth Karimireddy, Satyen Kale, Mehryar Mohri, Sashank Reddi, Sebastian Stich, and  
564 Ananda Theertha Suresh. Scaffold: Stochastic controlled averaging for federated learning. In  
565 *International conference on machine learning*, pp. 5132–5143. PMLR, 2020.
- 566 Junhyung Lyle Kim, Taha Toghiani, Cesar A Uribe, and Anastasios Kyrillidis. Adaptive federated  
567 learning with auto-tuned clients. In *The Twelfth International Conference on Learning Representa-*  
568 *tions*, 2024. URL <https://openreview.net/forum?id=g0mlwqs8pi>.
- 569 Minjae Kim, Sangyoon Yu, Suhyun Kim, and Soo-Mook Moon. DepthFL : Depthwise federated  
570 learning for heterogeneous clients. In *The Eleventh International Conference on Learning Repre-*  
571 *sentations*, 2023. URL <https://openreview.net/forum?id=pf8RIZTMU58>.
- 572 Alex Krizhevsky, Geoffrey Hinton, et al. Learning multiple layers of features from tiny images. 2009.
- 573 Maxim Lapan. *Deep Reinforcement Learning Hands-On: Apply modern RL methods to practical*  
574 *problems of chatbots, robotics, discrete optimization, web automation, and more*. Packt Publishing  
575 Ltd, 2020.
- 576 Qinbin Li, Zeyi Wen, Zhaomin Wu, Sixu Hu, Naibo Wang, Yuan Li, Xu Liu, and Bingsheng He. A  
577 survey on federated learning systems: Vision, hype and reality for data privacy and protection.  
578 *IEEE Transactions on Knowledge and Data Engineering*, 35(4):3347–3366, 2021.
- 579 Tian Li, Anit Kumar Sahu, Manzil Zaheer, Maziar Sanjabi, Ameet Talwalkar, and Virginia Smith.  
580 Federated optimization in heterogeneous networks. *Proceedings of Machine learning and systems*,  
581 2:429–450, 2020.
- 582 Zilinghan Li, Pranshu Chaturvedi, Shilan He, Han Chen, Gagandeep Singh, Volodymyr Kindratenko,  
583 Eliu A Huerta, Kibaek Kim, and Ravi Madduri. Fedcompass: Efficient cross-silo federated  
584 learning on heterogeneous client devices using a computing power-aware scheduler. In *The Twelfth*  
585 *International Conference on Learning Representations*, 2024. URL [https://openreview.](https://openreview.net/forum?id=msXxrttLOi)  
586 [net/forum?id=msXxrttLOi](https://openreview.net/forum?id=msXxrttLOi).

- 594 Timothy P. Lillicrap, Jonathan J. Hunt, Alexander Pritzel, Nicolas Heess, Tom Erez, Yuval Tassa,  
595 David Silver, and Daan Wierstra. Continuous control with deep reinforcement learning. In  
596 Yoshua Bengio and Yann LeCun (eds.), *4th International Conference on Learning Representations,*  
597 *ICLR 2016, San Juan, Puerto Rico, May 2-4, 2016, Conference Track Proceedings*, 2016. URL  
598 <http://arxiv.org/abs/1509.02971>.
- 599  
600 Jung-Chun Liu, Chi-Hsien Chang, Shao-Hua Sun, and Tian-Li Yu. Integrating planning and deep  
601 reinforcement learning via automatic induction of task substructures. In *The Twelfth International*  
602 *Conference on Learning Representations*, 2024. URL [https://openreview.net/forum?](https://openreview.net/forum?id=PR6RMsxuW7)  
603 [id=PR6RMsxuW7](https://openreview.net/forum?id=PR6RMsxuW7).
- 604 Ilya Loshchilov and Frank Hutter. Sgdr: Stochastic gradient descent with warm restarts. *arXiv*  
605 *preprint arXiv:1608.03983*, 2016.
- 606  
607 Brendan McMahan, Eider Moore, Daniel Ramage, Seth Hampson, and Blaise Aguera y Arcas.  
608 Communication-efficient learning of deep networks from decentralized data. In *Artificial intelli-*  
609 *gence and statistics*, pp. 1273–1282. PMLR, 2017.
- 610 Adam Paszke, Sam Gross, Francisco Massa, Adam Lerer, James Bradbury, Gregory Chanan, Trevor  
611 Killeen, Zeming Lin, Natalia Gimelshein, Luca Antiga, et al. Pytorch: An imperative style,  
612 high-performance deep learning library. *Advances in neural information processing systems*, 32,  
613 2019.
- 614  
615 Aske Plaat. *Deep reinforcement learning*, volume 10. Springer, 2022.
- 616  
617 Sebastian Ruder. An overview of gradient descent optimization algorithms. *arXiv preprint*  
618 *arXiv:1609.04747*, 2016.
- 619  
620 John Schulman, Filip Wolski, Prafulla Dhariwal, Alec Radford, and Oleg Klimov. Proximal policy  
621 optimization algorithms. *arXiv preprint arXiv:1707.06347*, 2017.
- 622  
623 Jonathan Scott, Hossein Zakerinia, and Christoph H Lampert. PeFLL: Personalized federated learning  
624 by learning to learn. In *The Twelfth International Conference on Learning Representations*, 2024.  
625 URL <https://openreview.net/forum?id=MrYiwLDRQO>.
- 626  
627 Richard S Sutton. Reinforcement learning: An introduction. *A Bradford Book*, 2018.
- 628  
629 Alysa Ziying Tan, Han Yu, Lizhen Cui, and Qiang Yang. Towards personalized federated learning.  
630 *IEEE transactions on neural networks and learning systems*, 34(12):9587–9603, 2022.
- 631  
632 Zhenheng Tang, Yonggang Zhang, Shaohuai Shi, Xinmei Tian, Tongliang Liu, Bo Han, and Xiaowen  
633 Chu. Fedimpro: Measuring and improving client update in federated learning. In *The Twelfth*  
634 *International Conference on Learning Representations*, 2024. URL [https://openreview.](https://openreview.net/forum?id=giU9fYGTND)  
635 [net/forum?id=giU9fYGTND](https://openreview.net/forum?id=giU9fYGTND).
- 636  
637 Pauli Virtanen, Ralf Gommers, Travis E. Oliphant, Matt Haberland, Tyler Reddy, David Cournapeau,  
638 Evgeni Burovski, Pearu Peterson, Warren Weckesser, Jonathan Bright, Stéfan J. van der Walt,  
639 Matthew Brett, Joshua Wilson, K. Jarrod Millman, Nikolay Mayorov, Andrew R. J. Nelson, Eric  
640 Jones, Robert Kern, Eric Larson, C J Carey, İlhan Polat, Yu Feng, Eric W. Moore, Jake VanderPlas,  
641 Denis Laxalde, Josef Perktold, Robert Cimrman, Ian Henriksen, E. A. Quintero, Charles R. Harris,  
642 Anne M. Archibald, Antônio H. Ribeiro, Fabian Pedregosa, Paul van Mulbregt, and SciPy 1.0  
643 Contributors. SciPy 1.0: Fundamental Algorithms for Scientific Computing in Python. *Nature*  
644 *Methods*, 17:261–272, 2020. doi: 10.1038/s41592-019-0686-2.
- 645  
646 Kay White Vugrin, Laura Painton Swiler, Randall M Roberts, Nicholas J Stucky-Mack, and Sean P  
647 Sullivan. Confidence region estimation techniques for nonlinear regression in groundwater flow:  
648 Three case studies. *Water Resources Research*, 43(3), 2007.
- 649  
650 Haozhao Wang, Haoran Xu, Yichen Li, Yuan Xu, Ruixuan Li, and Tianwei Zhang. FedCDA:  
651 Federated learning with cross-rounds divergence-aware aggregation. In *The Twelfth International*  
652 *Conference on Learning Representations*, 2024a. URL [https://openreview.net/forum?](https://openreview.net/forum?id=nbPGqeH3lt)  
653 [id=nbPGqeH3lt](https://openreview.net/forum?id=nbPGqeH3lt).

- 648 Yujia Wang, Yuanpu Cao, Jingcheng Wu, Ruoyu Chen, and Jinghui Chen. Tackling the data  
649 heterogeneity in asynchronous federated learning with cached update calibration. In *The Twelfth*  
650 *International Conference on Learning Representations*, 2024b. URL <https://openreview.net/forum?id=4aywmeb97I>.  
651
- 652 Ziyao Wang, Jianyu Wang, and Ang Li. Fedhyper: A universal and robust learning rate scheduler for  
653 federated learning with hypergradient descent. In *The Twelfth International Conference on Learning*  
654 *Representations*, 2024c. URL <https://openreview.net/forum?id=Kl9CqKf7h6>.  
655
- 656 Di Wu, Jun Bai, Yiliao Song, Junjun Chen, Wei Zhou, Yong Xiang, and Atul Sajjanhar. Fedinverse:  
657 Evaluating privacy leakage in federated learning. In *The Twelfth International Conference on*  
658 *Learning Representations, ICLR 2024, Vienna, Austria, May 7-11, 2024*. OpenReview.net, 2024.  
659 URL <https://openreview.net/forum?id=nTNqkEIfeb>.
- 660 Qiong Wu, Kaiwen He, and Xu Chen. Personalized federated learning for intelligent iot applications:  
661 A cloud-edge based framework. *IEEE Open Journal of the Computer Society*, 1:35–44, 2020.  
662
- 663 Han Xiao, Kashif Rasul, and Roland Vollgraf. Fashion-mnist: a novel image dataset for benchmarking  
664 machine learning algorithms, 2017.
- 665 Jian Xu, Xinyi Tong, and Shao-Lun Huang. Personalized federated learning with feature alignment  
666 and classifier collaboration. In *The Eleventh International Conference on Learning Representations*,  
667 2023. URL <https://openreview.net/forum?id=SXZr8aDKia>.
- 668 Dong Yin, Yudong Chen, Ramchandran Kannan, and Peter Bartlett. Byzantine-robust distributed  
669 learning: Towards optimal statistical rates. In *International conference on machine learning*, pp.  
670 5650–5659. Pmlr, 2018.  
671
- 672 Shuyang Yu, Junyuan Hong, Haotao Wang, Zhangyang Wang, and Jiayu Zhou. Turning the curse of  
673 heterogeneity in federated learning into a blessing for out-of-distribution detection. In *The Eleventh*  
674 *International Conference on Learning Representations*, 2023. URL <https://openreview.net/forum?id=mMNimwRb7Gr>.  
675
- 676 Mikhail Yurochkin, Mayank Agarwal, Soumya Ghosh, Kristjan Greenewald, Nghia Hoang, and  
677 Yasaman Khazaeni. Bayesian nonparametric federated learning of neural networks. In *International*  
678 *conference on machine learning*, pp. 7252–7261. PMLR, 2019.
- 679 Jianqing Zhang, Yang Hua, Hao Wang, Tao Song, Zhengui Xue, Ruhui Ma, and Haibing Guan.  
680 Fedala: Adaptive local aggregation for personalized federated learning. In *Proceedings of the*  
681 *AAAI Conference on Artificial Intelligence*, volume 37, pp. 11237–11244, 2023.  
682

## 683 A APPENDIX

### 684 A.1 PRECISION, RECALL, AND F1-SCORES

685  
686  
687 Based on the formulations in (Japkowicz & Shah, 2011), given a classifier  $f$ , Precision (P), Recall  
688 (R), and  $F\alpha$ -Scores ( $F\alpha$ ) are defined as:

$$690 P(f) = \frac{TP}{TP + FP}$$

$$692 R(f) = \frac{TP}{TP + FN}$$

$$694 F\alpha(f) = \frac{(1 - \alpha)(P(f) * R(f))}{\alpha P + R}$$

695  
696  
697 As a variant of F-Scores, with  $\alpha = 1$ , F1-Score (F1) is defined as:

$$698 F1(f) = \frac{2(P(f) * R(f))}{P + R}$$

699  
700  
701 Where TP, FP, and FN, are True Positives, False Positives, and False Negatives, respectively.

## A.2 VALIDATION PLOTS

The validation accuracy plots for each dataset including Fashion Mnist, CIFAR 10, and CIFAR 100 are presented below.

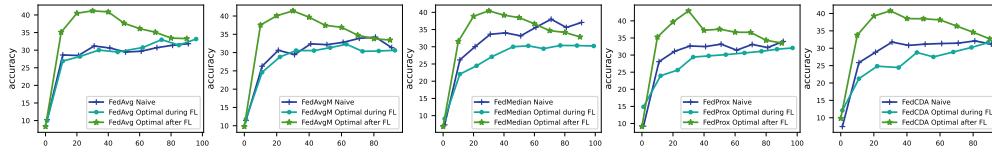

(a) Validation Accuracy - CIFAR10

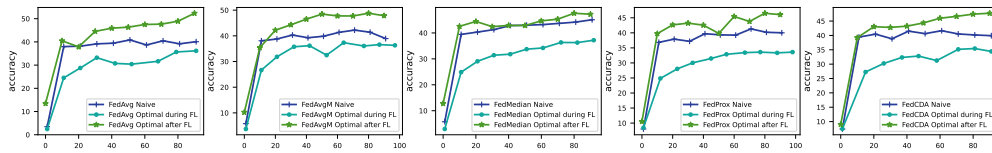

(b) Validation Accuracy - FashionMNIST

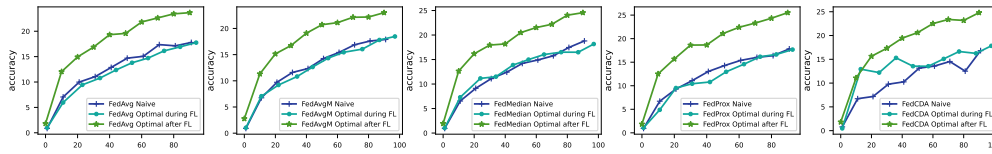

(c) Validation Accuracy - CIFAR100

## A.3 EXPERIMENT HYPERPARAMETERS

The hyperparameters for the federated learning procedure are given below:

NUM\_CLIENTS = 8

LOCAL\_TRAINING\_EPOCHS = 1

LOCAL\_LEARNING\_RATE = 1e-5

LOSS\_ESTIMATION\_WAITING\_PERIOD = 5

LOCAL\_TRAINING\_BATCH\_SIZE = 16

DATASETS = [

{

  'name': 'cifar100',

  'num\_classes': 100,

  'input\_shape': 224,

  'training\_periods': 100,

  'optimizer\_config':

  {

    'learning\_rate': 0.001,

    'learning\_rate\_decay': 0.1,

    'learning\_rate\_decay\_period': 30,

    'weight\_decay': 1e-4,

  },

},

{

  'name': 'cifar10',

  'num\_classes': 10,

  'input\_shape': 224,

  'training\_periods': 100,

  'optimizer\_config':

  {

```

756         'learning_rate': 0.001,
757         'learning_rate_decay': 0.1,
758         'learning_rate_decay_period': 30,
759         'weight_decay': 1e-4,
760     },
761 },
762 {
763     'name': 'fashion_mnist',
764     'num_classes': 10,
765     'input_shape': 224,
766     'training_periods': 100,
767     'optimizer_config':
768     {
769         'learning_rate': 0.0001,
770         'learning_rate_decay': 0.1,
771         'learning_rate_decay_period': 30,
772         'weight_decay': 1e-4,
773     },
774 }
775 ]
776 #retraining the Optimal Client after the federated learning rounds
777 RETRAINING_LEARNING_RATE = 1e-6
778

```

#### 779 A.4 RL TRAINING

781 RL training is conducted, in an episodic manner, using DDPG (Deep Deterministic Policy Gradient)  
782 (Lillicrap et al., 2016) adapted to continuous actions using (Lapan, 2020). In the actor and the  
783 critic networks we use *Softplus* activation. Both networks are optimized using Stochastic Gradient  
784 Descent (SGD) (Ruder, 2016) with a Cosine Annealing Learning Rate scheduler (Loshchilov &  
785 Hutter, 2016). Hyperparameters for the training procedure are presented below:

```

786 GAMMA = 0.99 #reward discount factor
787 REWARD_STEPS = 4
788 EPISODE_LENGTH = 4
789
790 #number of hidden neurons in the actor and critic networks
791 HID_SIZE = 128
792
793 #SGD learning rate
794 ACTOR_LEARNING_RATE = 0.02
795 CRITIC_LEARNING_RATE = 0.05
796

```

#### 797 A.5 ENVIRONMENT AND LIBRARIES.

798 Our experiments are implemented in Python. Additionally, we use scientific programming libraries  
799 including scikit-learn Buitinck et al. (2013), Numpy Harris et al. (2020), Flower Beutel et al. (2020),  
800 Scipy Virtanen et al. (2020), and PyTorch Paszke et al. (2019). All plots are generated using Matplotlib  
801 Hunter (2007) and Plotly Inc. (2015). The experiments are conducted using 3 NVIDIA GeForce RTX  
802 3080 GPUs.

803  
804  
805  
806  
807  
808  
809
