# Supplementary material
Source: ML conference proceedings conference paper supplement (https://openreview.net/forum?id=tiKJsepvr0)

## Optimal Actions

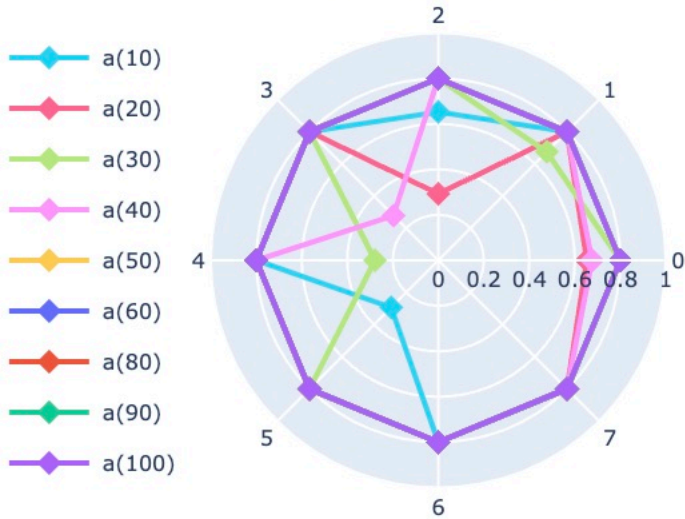

## Naive Actions

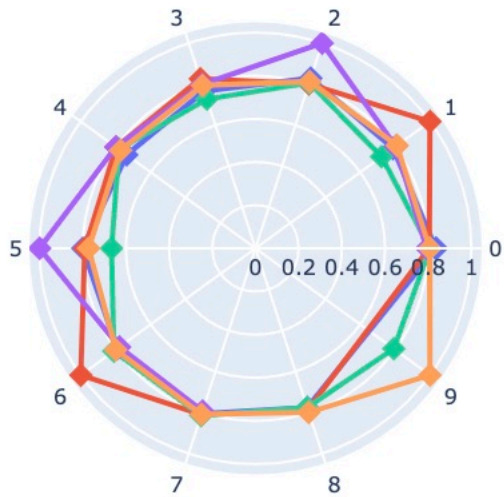

Supplement: supplementary_material [file attachment]

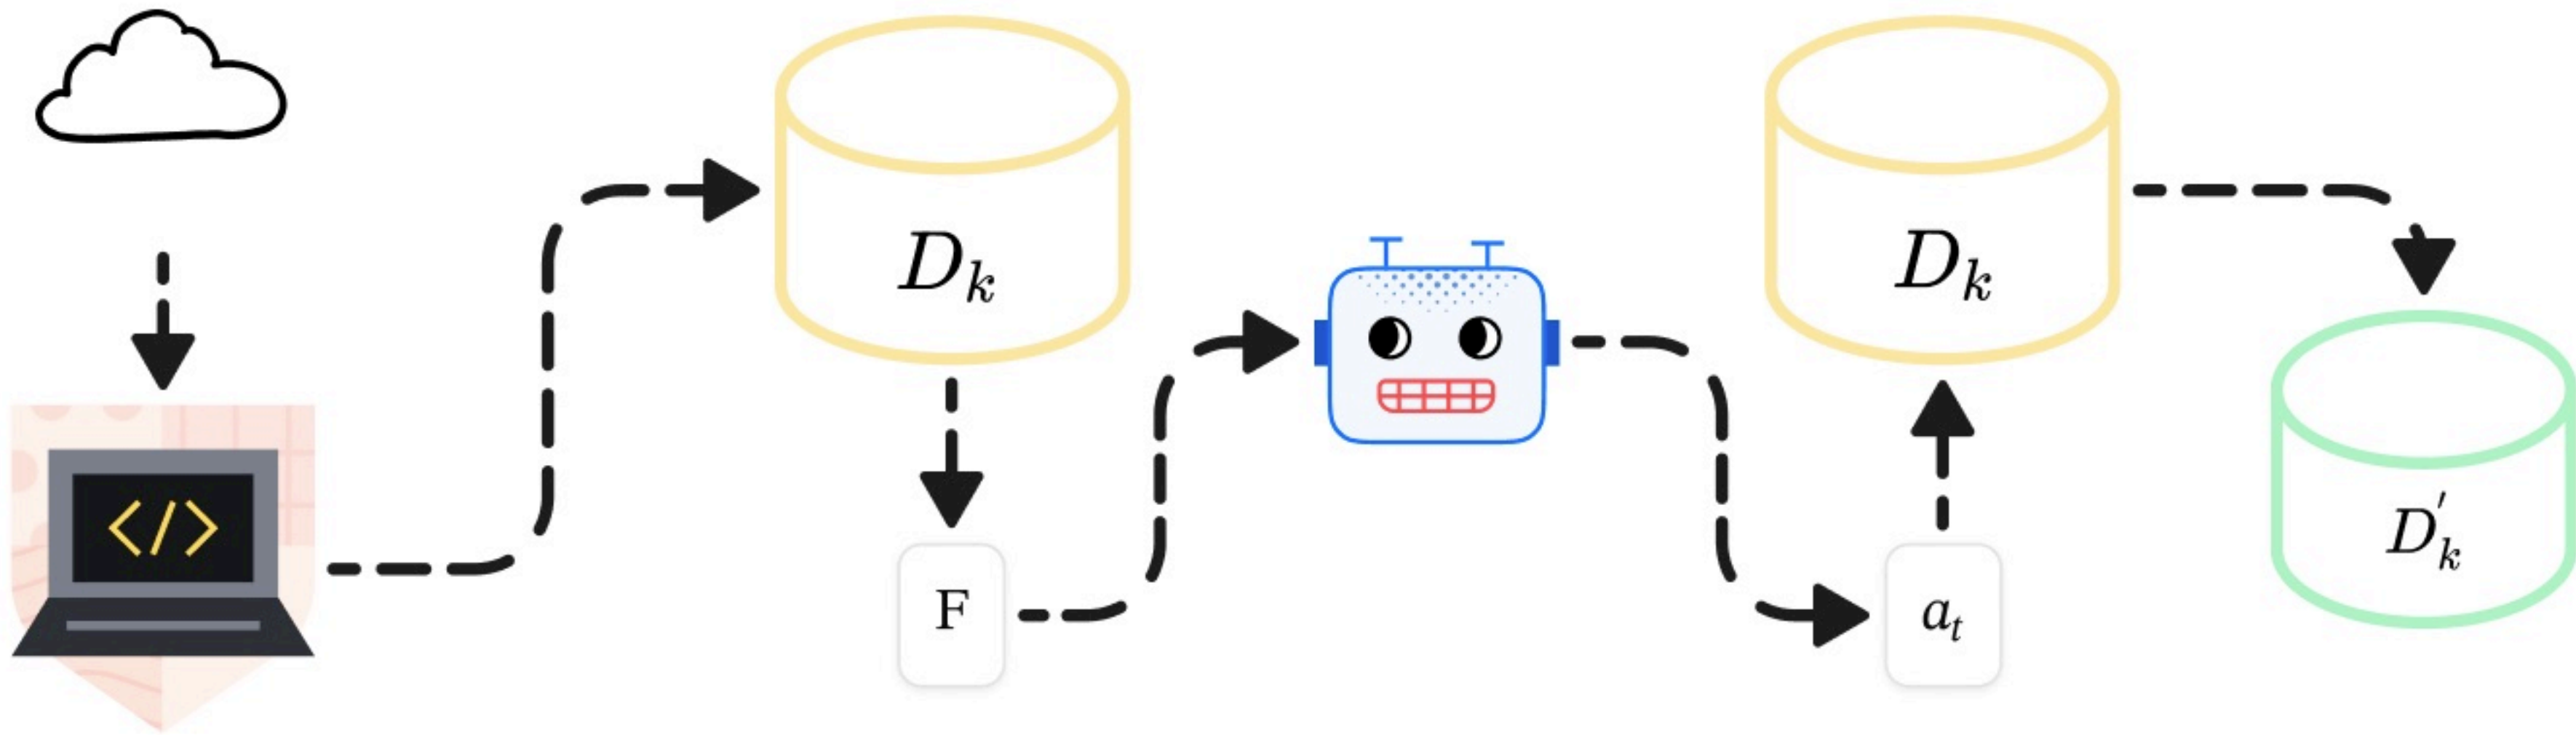

Supplement: supplementary_material [file attachment]

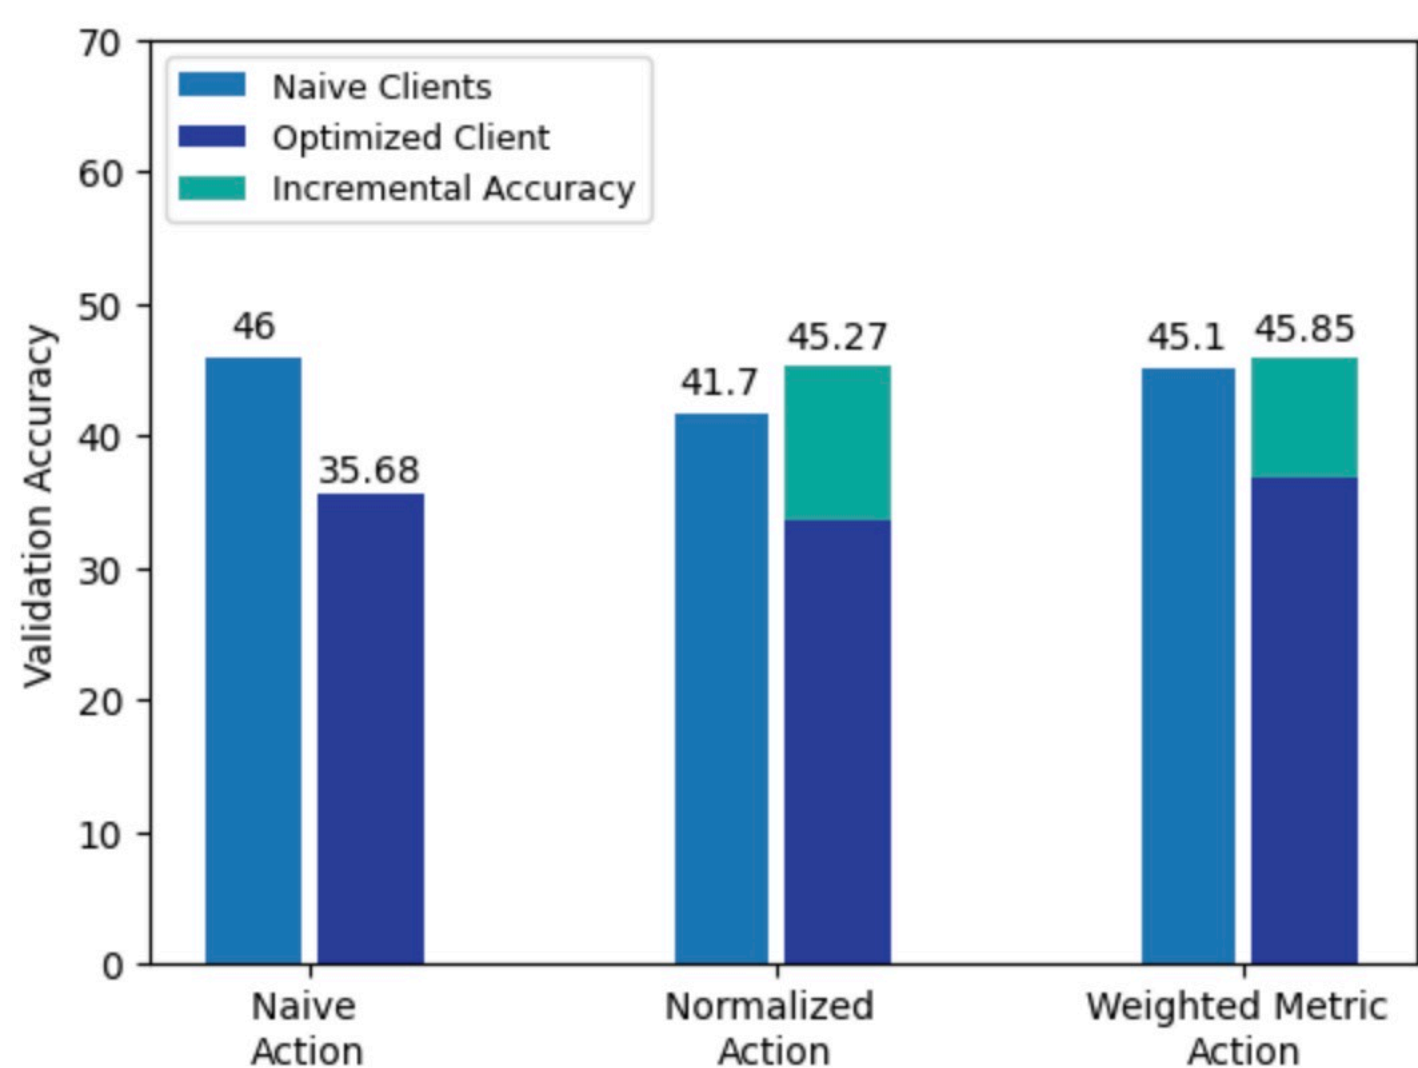

Supplement: supplementary_material [file attachment]

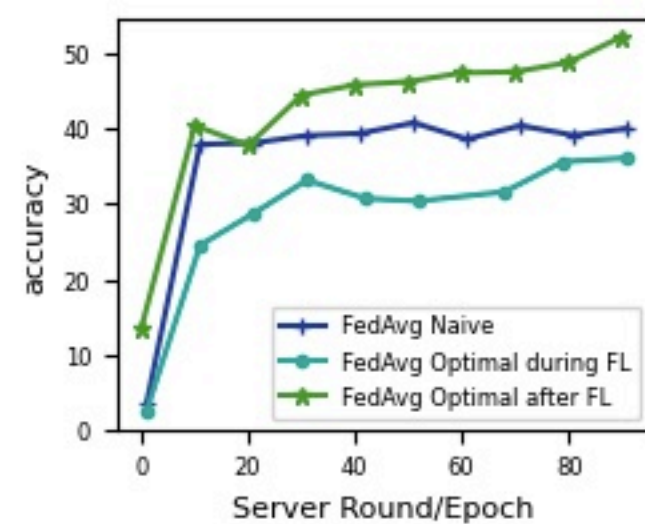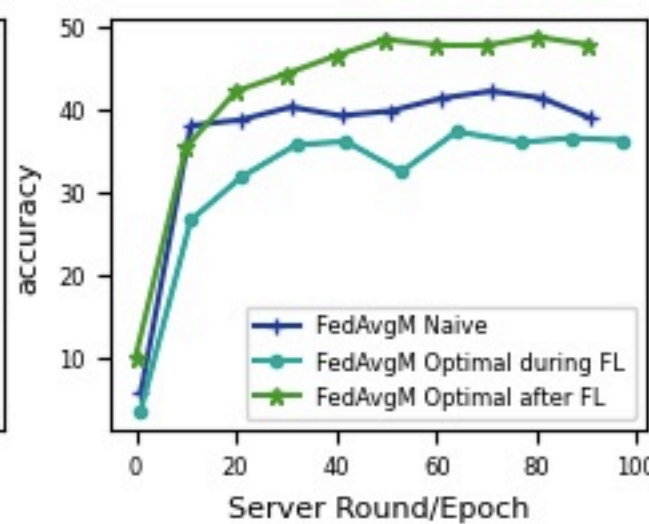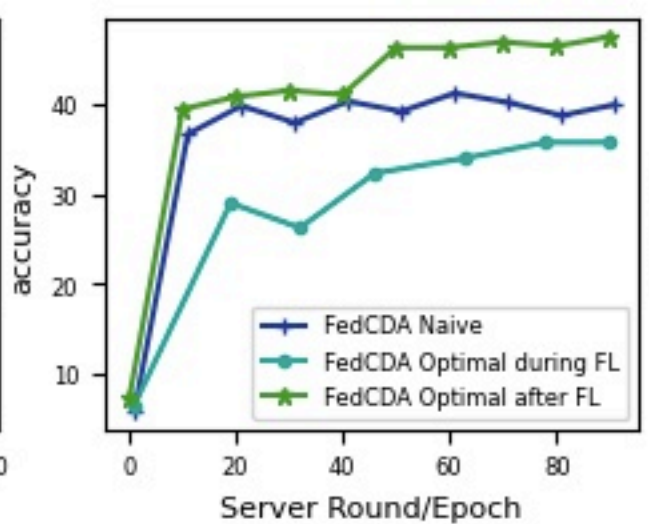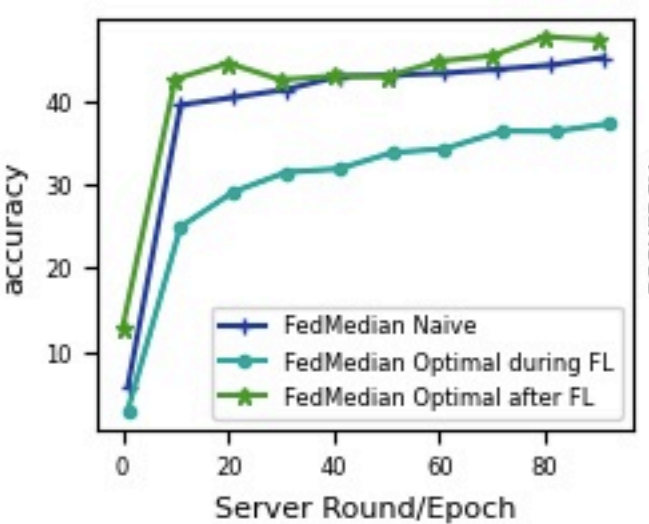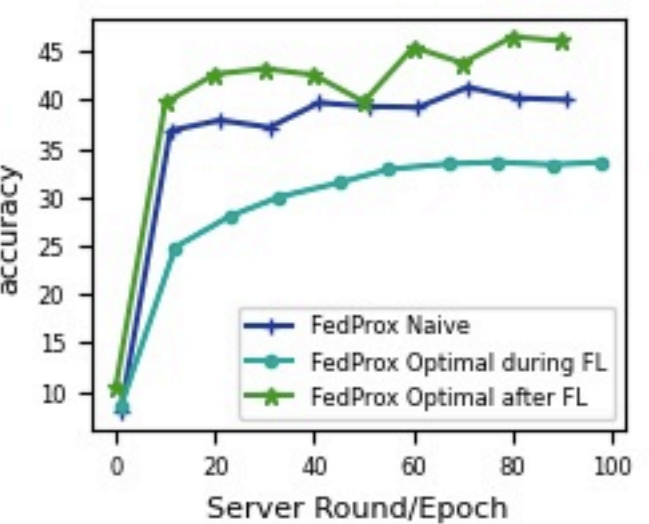

Supplement: supplementary_material [file attachment]

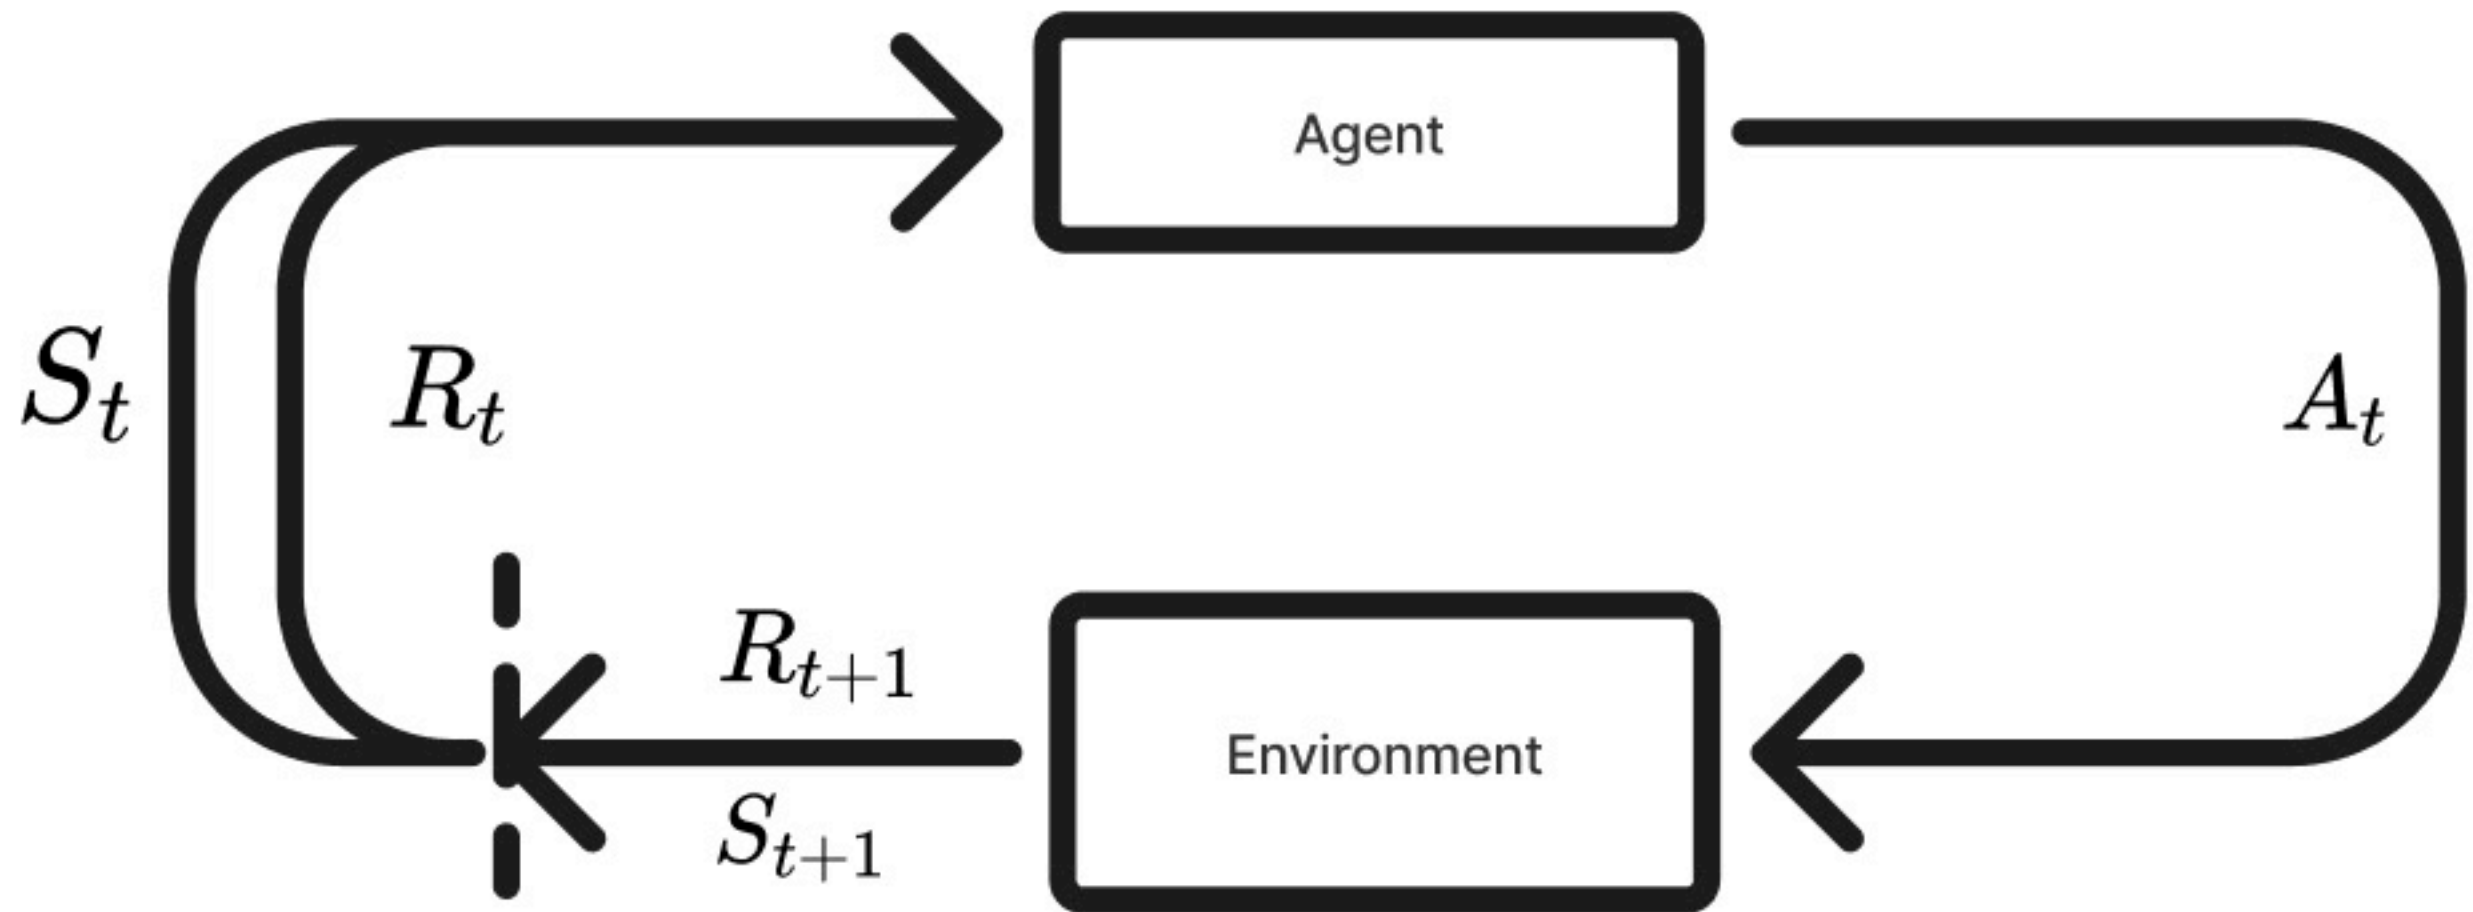

Supplement: supplementary_material [file attachment]

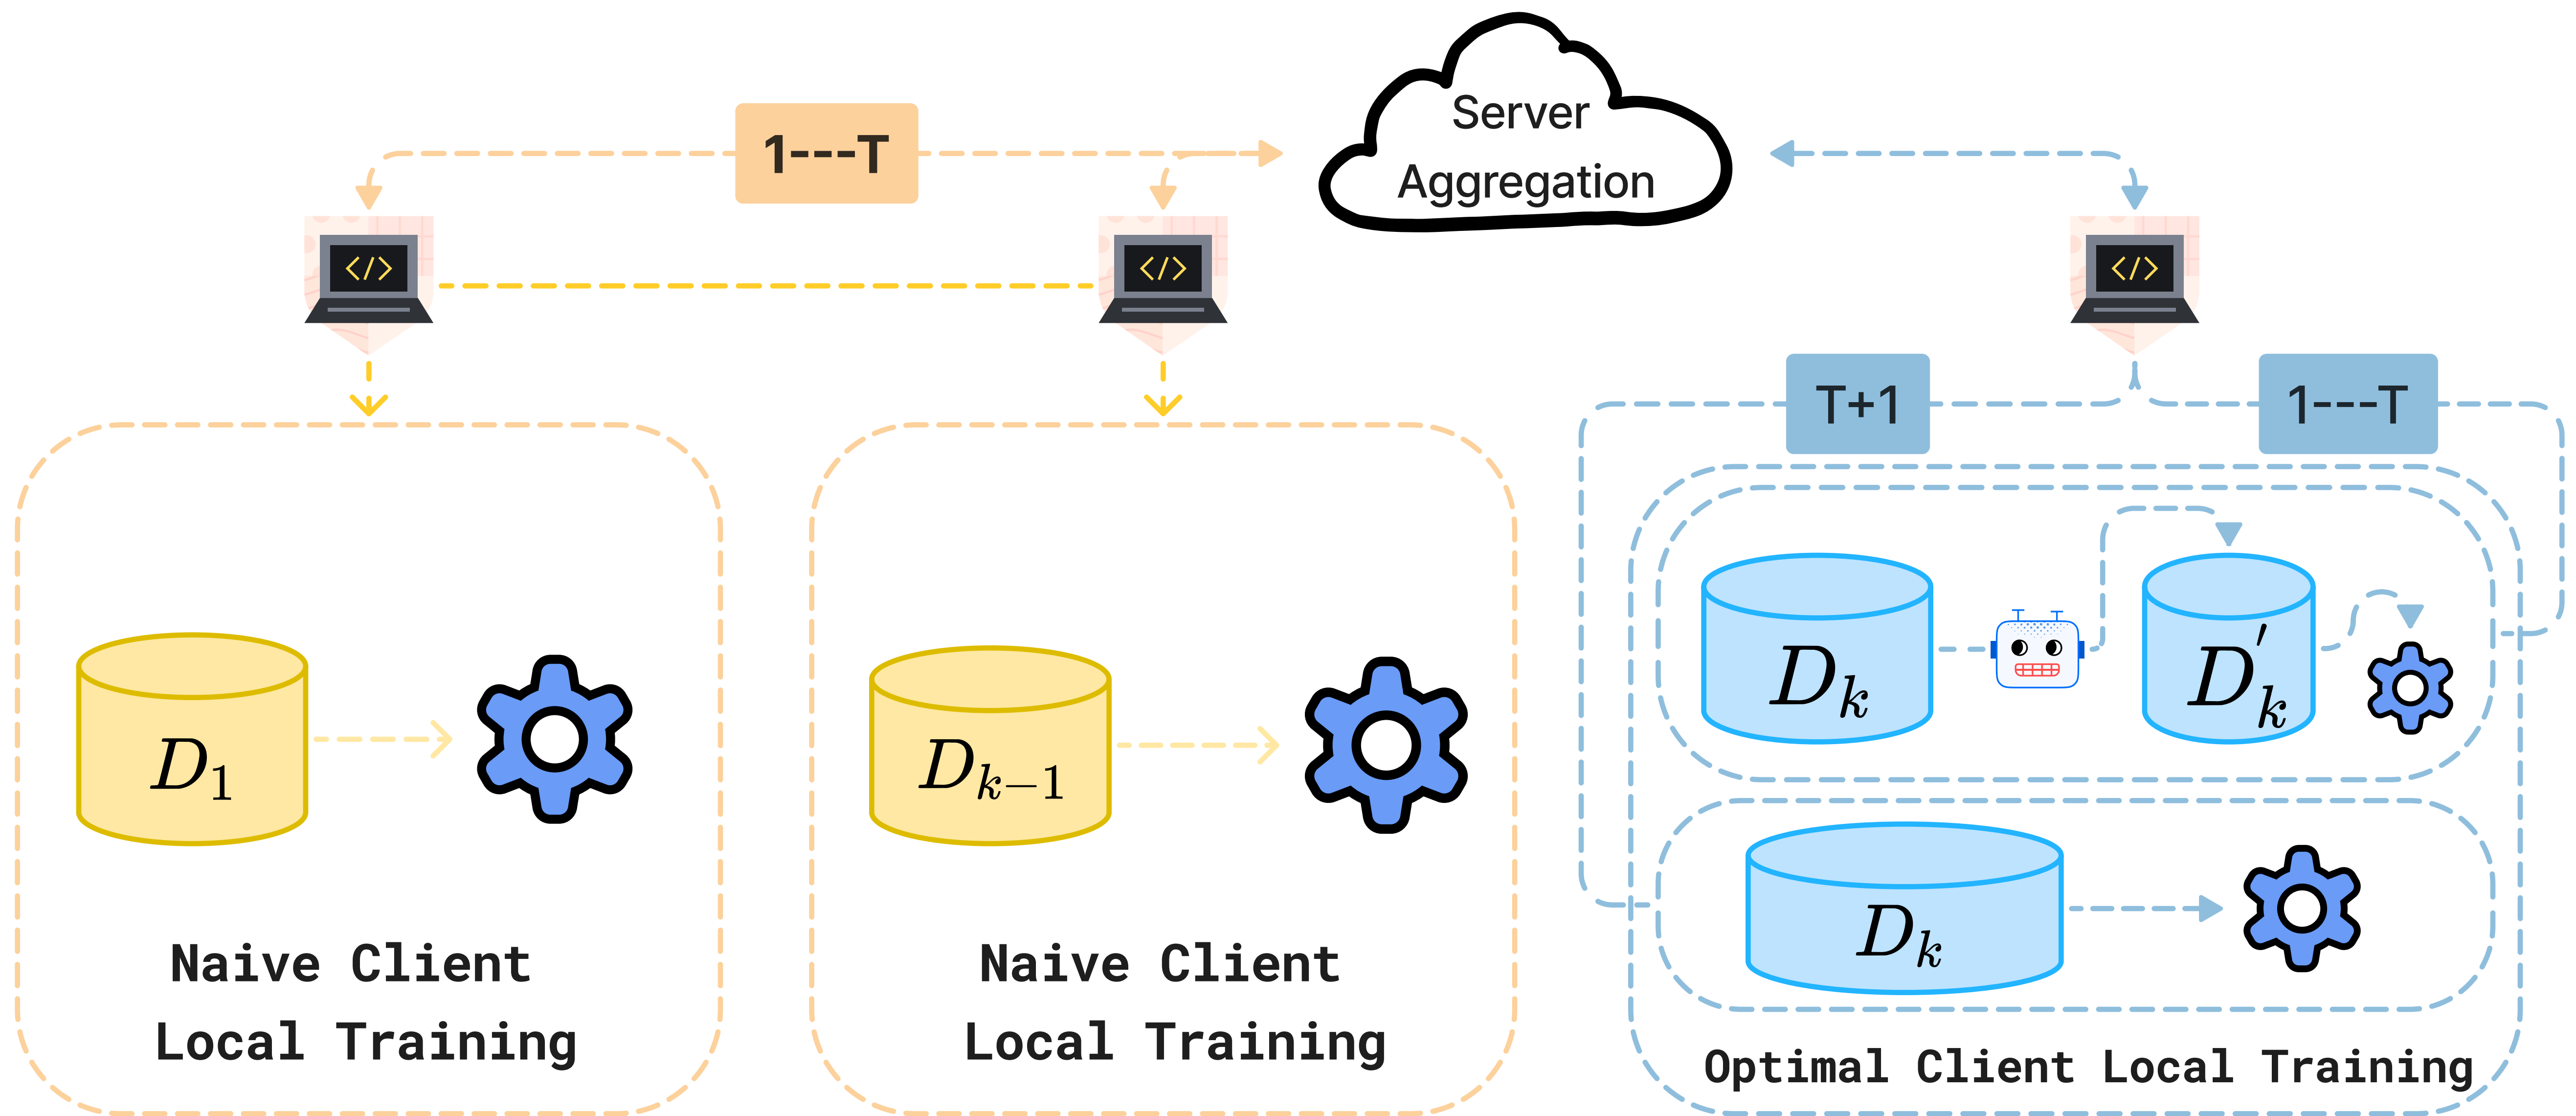

Supplement: supplementary_material [file attachment]

# Naive vs. Optimal Data Subset Selection

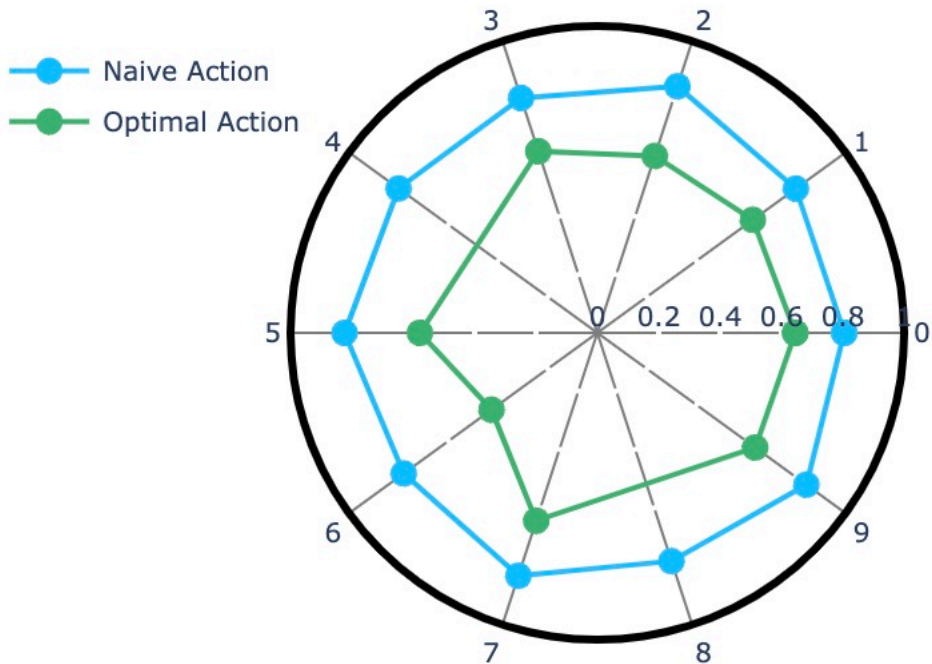

Supplement: supplementary_material [file attachment]

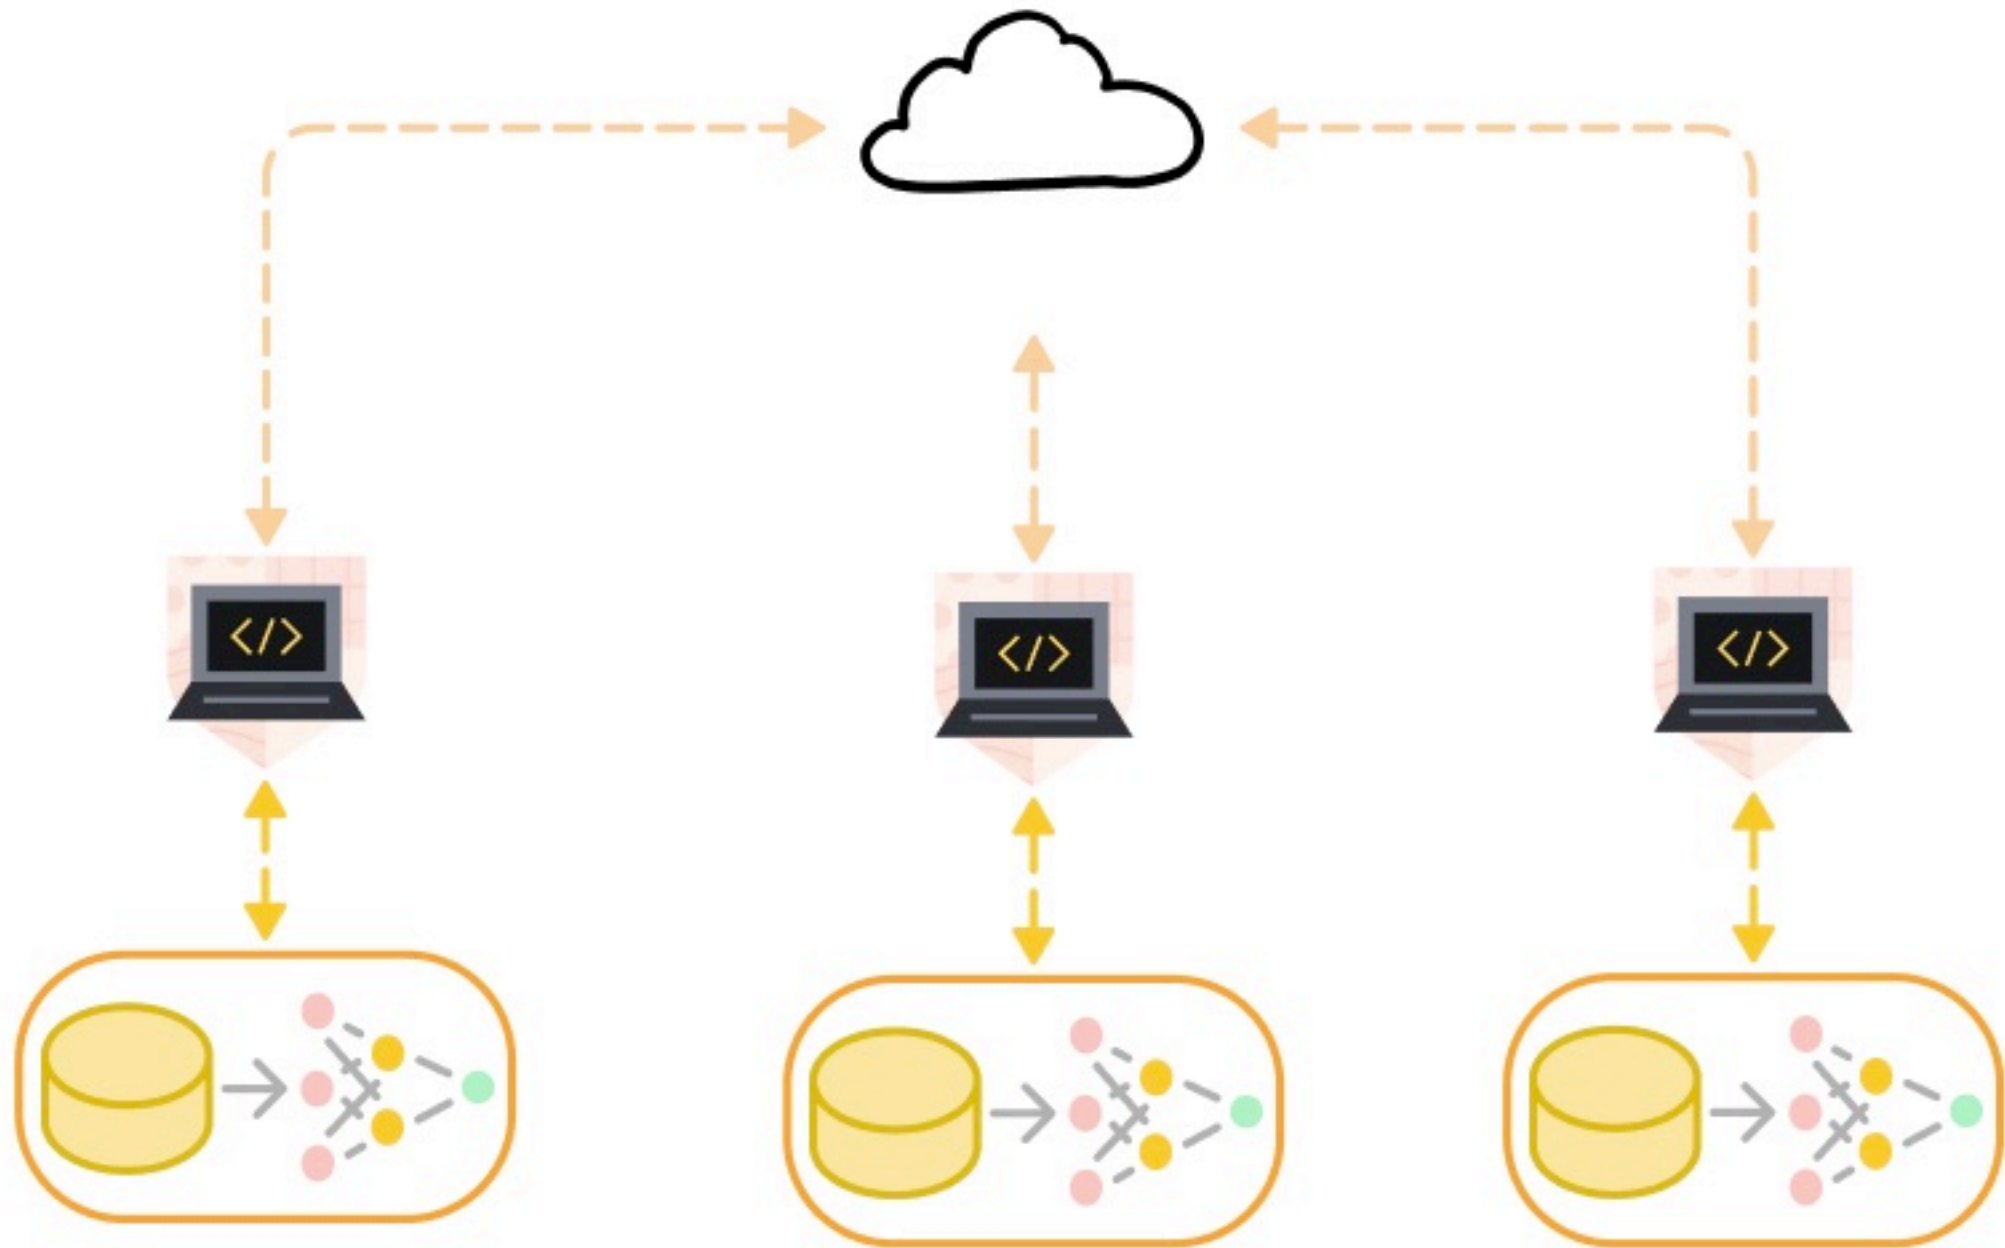

Supplement: supplementary_material [file attachment]
